# Supplementary material for: A physics-based Antarctic melt detection technique: Combining AMSR-2, radiative transfer modeling, and firn modeling
Source: Copernicus journal article supplement (doi:10.5194/tc-2023-136), 2023-09-08

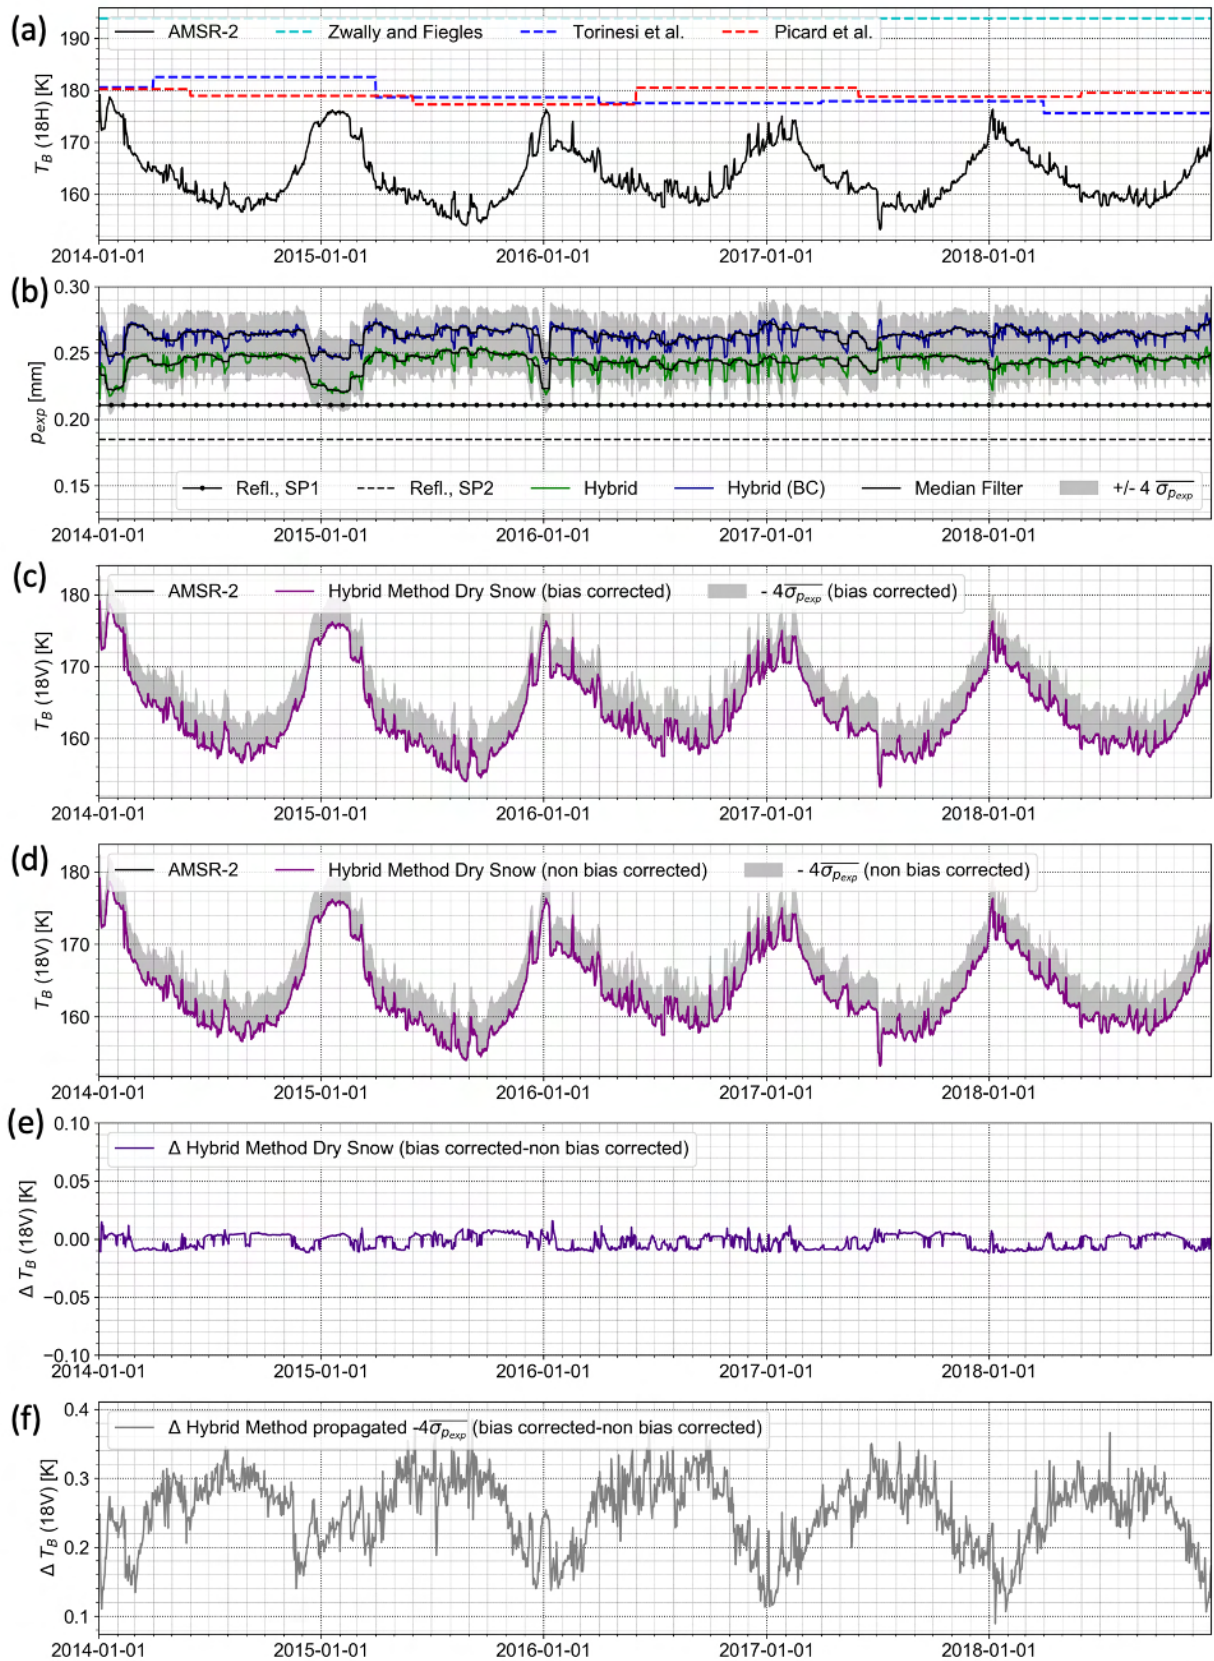

Figure S1: Same as Figure 3 from the main text, except using the 18H channel for all derivations. Dome C (a) Brightness temperature from AMSR-2 (18H; black line) with thresholding techniques from Zwally and Fiegles (1994; cyan line), Torinesi et al. (2003; blue line), and Picard et al. (2022a; red line). (b) Correlation length converted from NIR SSA values in Brucker et al. (2011) assuming a 4 m penetration depth (black dotted line) and a 10 m penetration depth (black dashed line). Correlation length computed from the hybrid method (18H; green line) and the hybrid method BC version (navy line) along with grey bounds that represent  $4\overline{\sigma_{p_{exp}}}$ . (c) AMSR-2 brightness temperature (18H; black line). Hybrid method dry snow brightness temperature, BC version (18H; purple line) along with propagated  $4\overline{\sigma_{p_{exp}}}$ . (d) Same as (c) but for non-BC version. (e) The difference between the hybrid method's dry snow brightness temperature BC and non-BC versions (18H; purple line). (f) The difference between propagated  $4\overline{\sigma_{p_{exp}}}$  between the BC and non-BC versions (grey line).

Figures S2 to S31 (See following pages): Data from AWS site listed in plot title. (a) Brightness temperature from 18H from AMSR-2 (black line) with thresholding techniques from Zwally and Fiegles (1994; cyan line), Torinesi et al. (2003; blue line), and Picard et al. (2022a; red line). (b) The exponential correlation length computed from the hybrid method (green line) along with  $\pm 4\overline{\sigma_{p_{exp}}}$  bounds, with median filter (black line). (c) AMSR-2 brightness temperature (18H; black line). Hybrid method dry snow brightness temperature (channel as listed in plot title; purple line) with propagated  $4\overline{\sigma_{p_{exp}}}$  (grey bounds). Melt days detected by hybrid method (blue dots).

Site: AWS 18, Channel: 18H

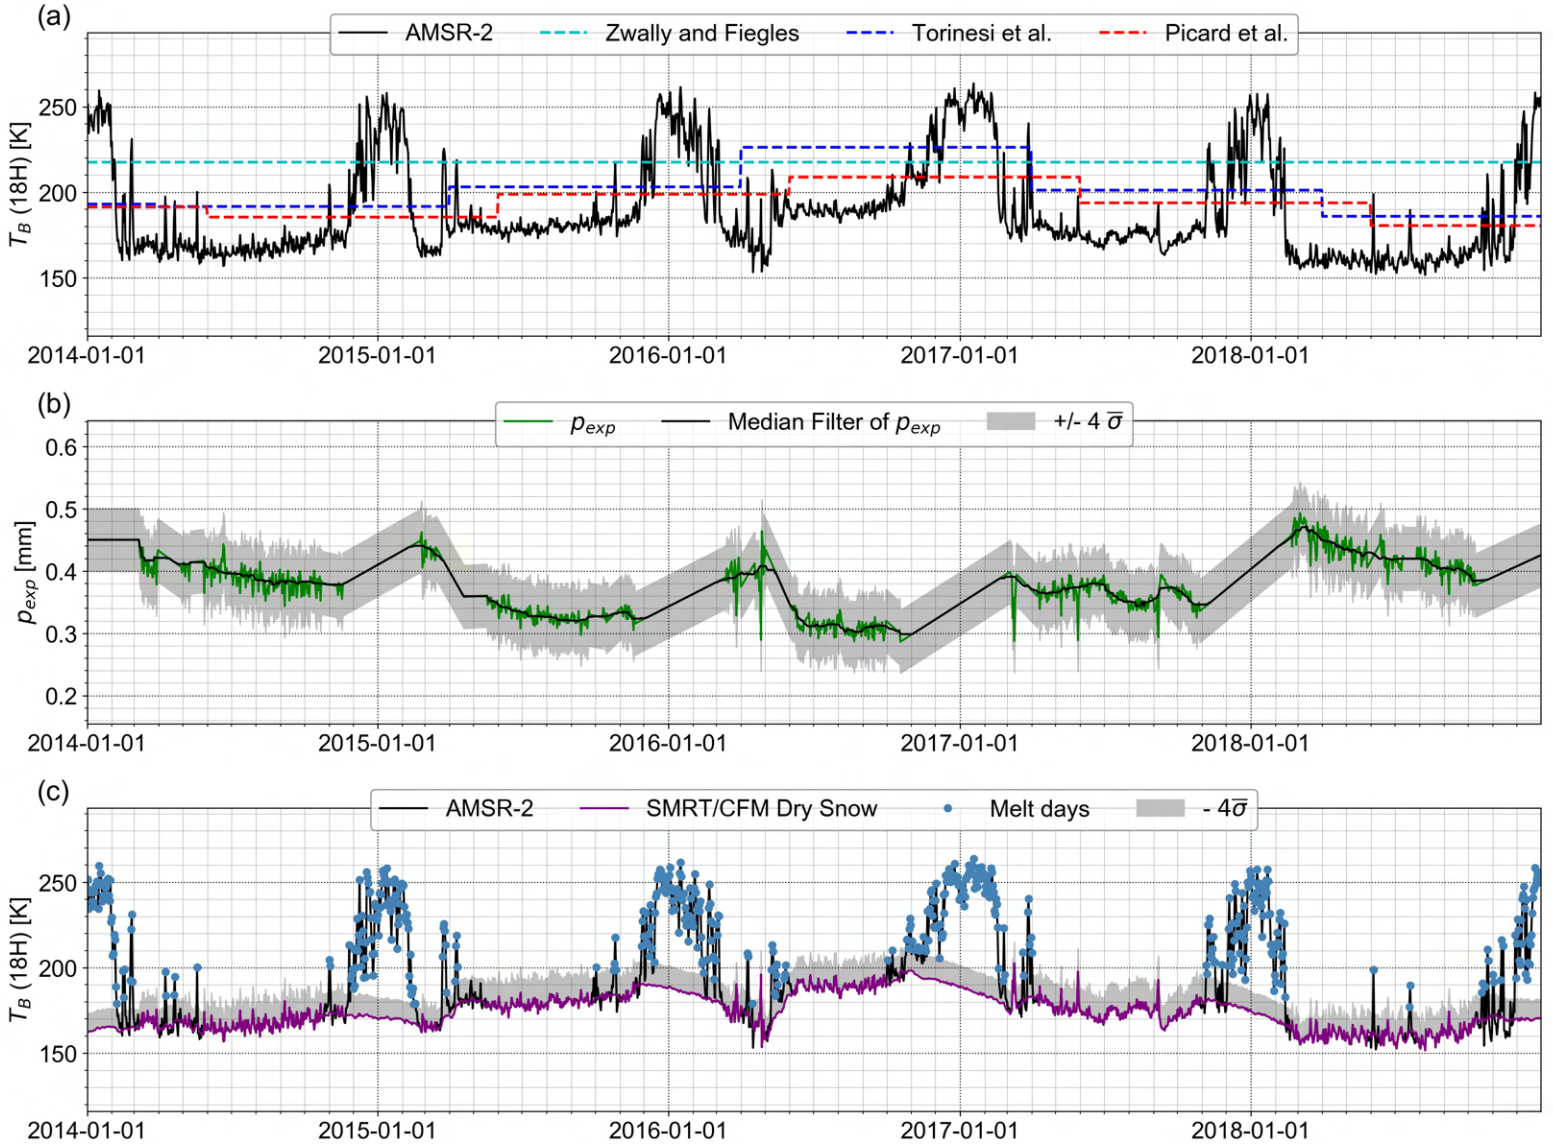

Site: AWS 18, Channel: 18V

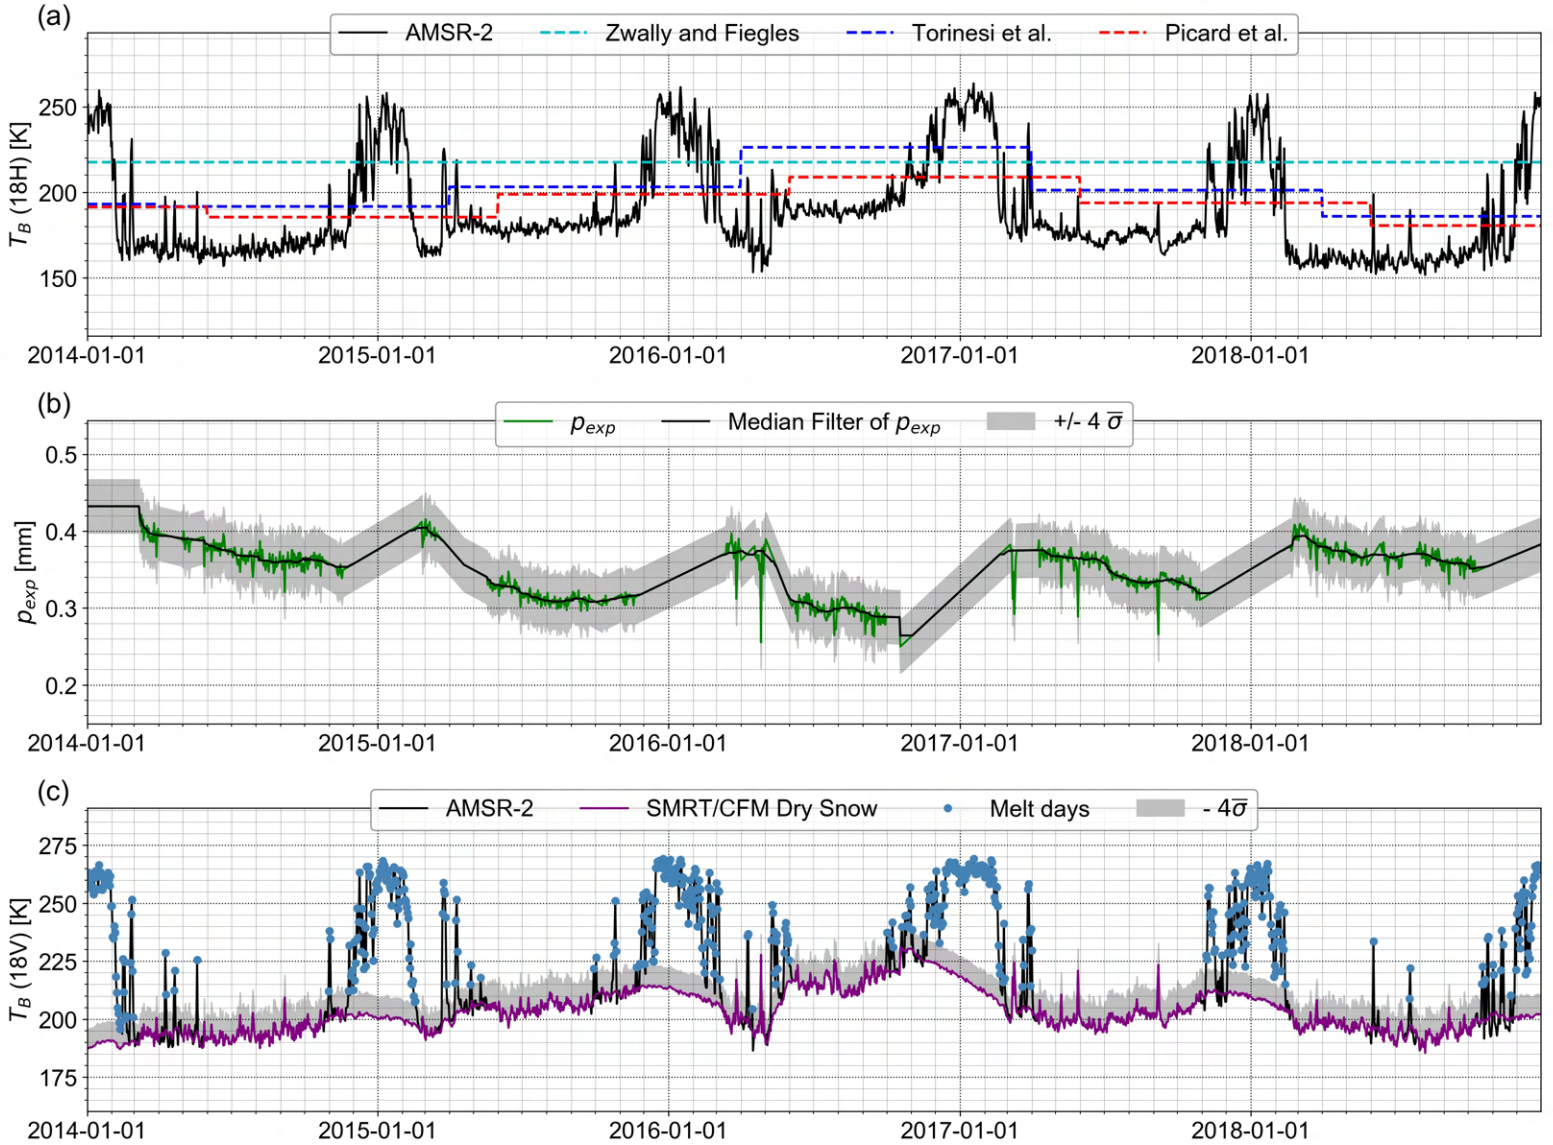

Site: AWS 5, Channel: 18H

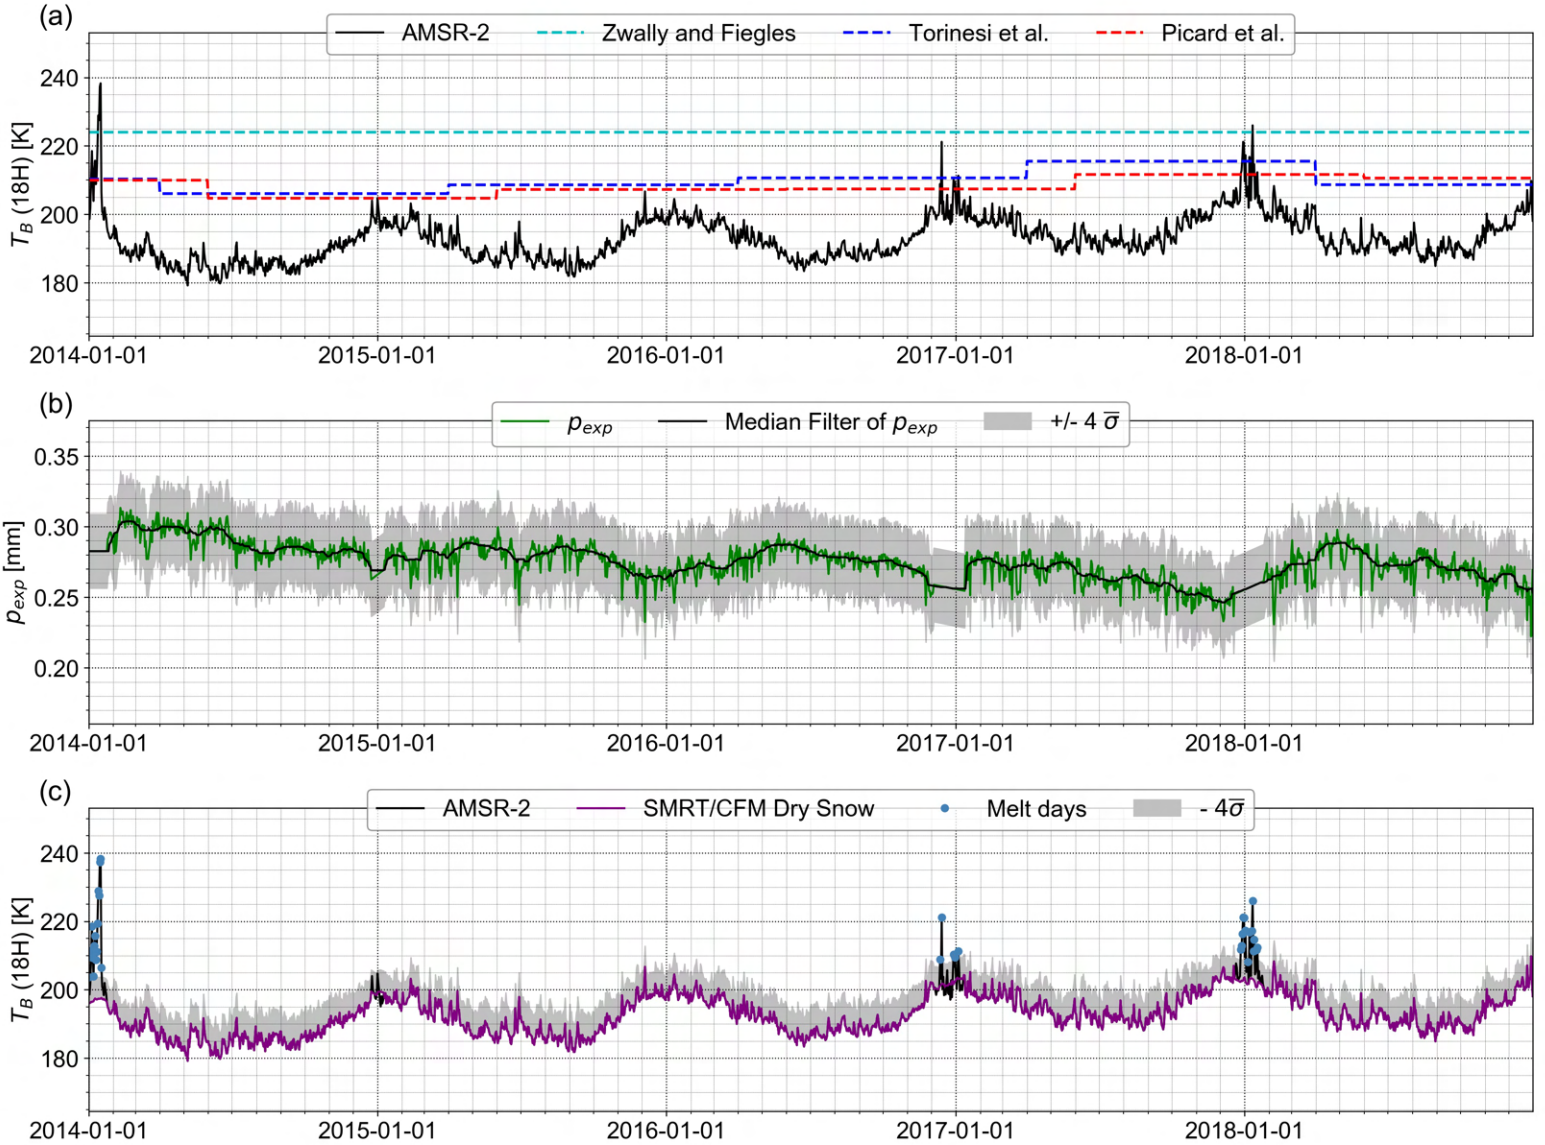

Site: AWS 5, Channel: 18V

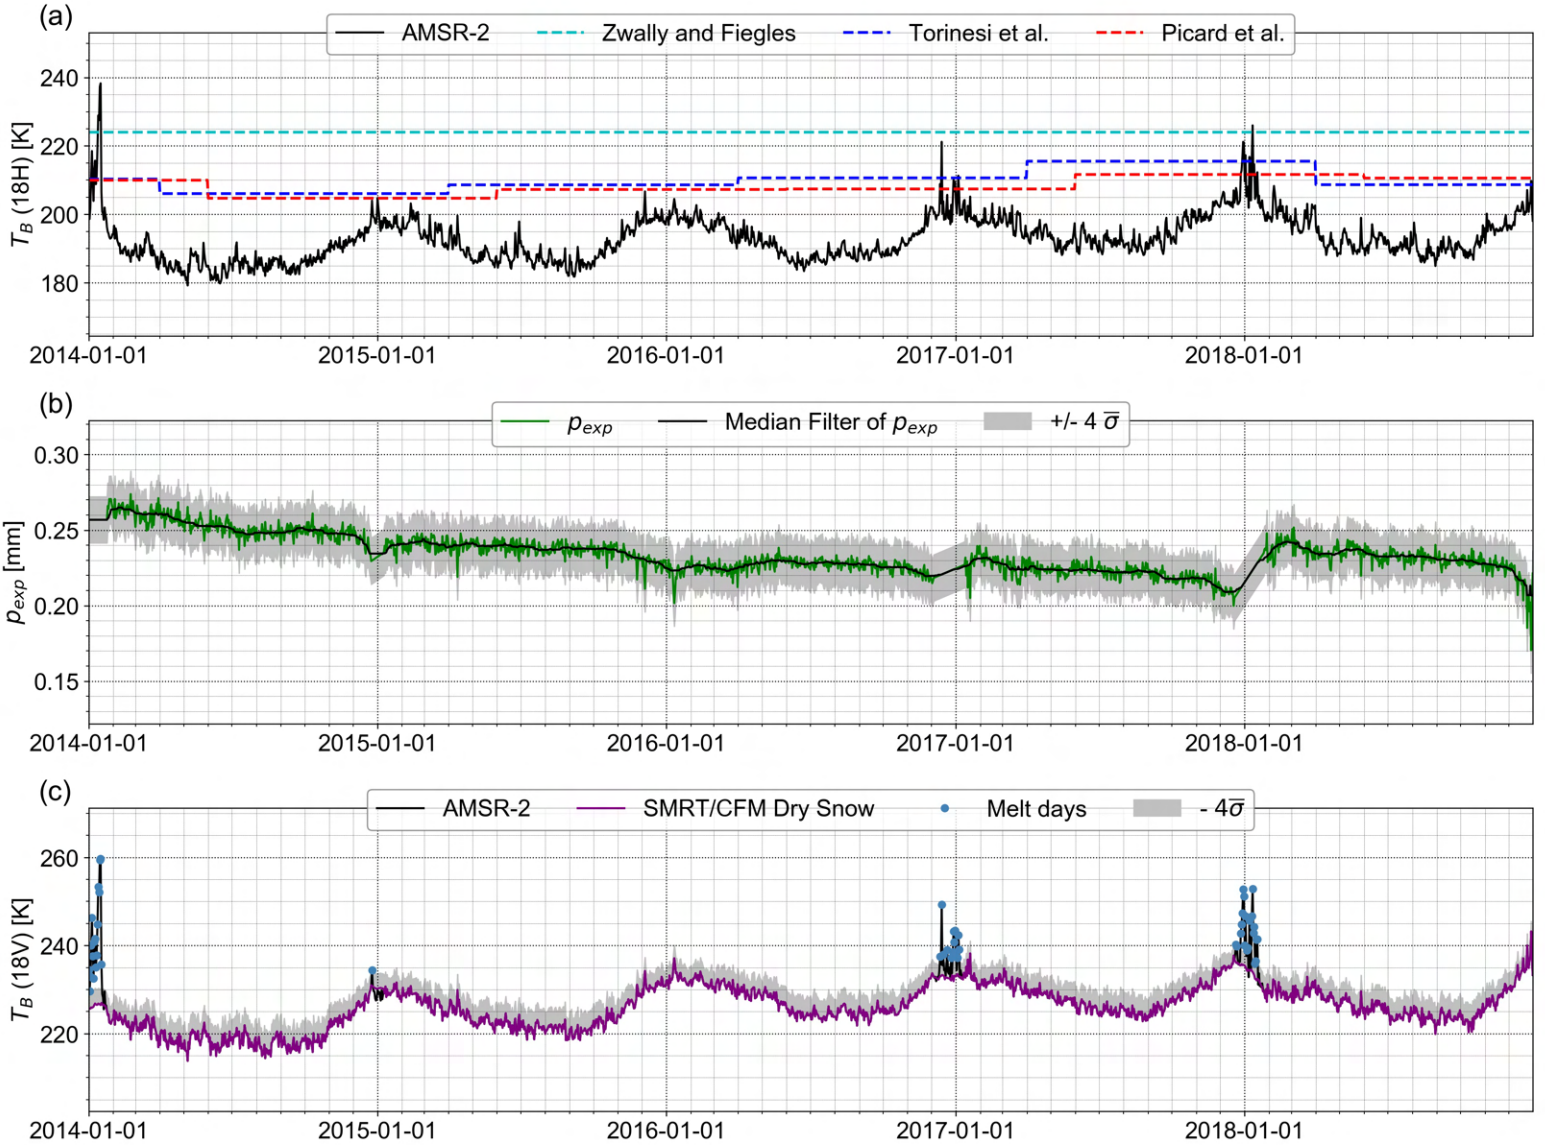

Site: AWS 4, Channel: 18H

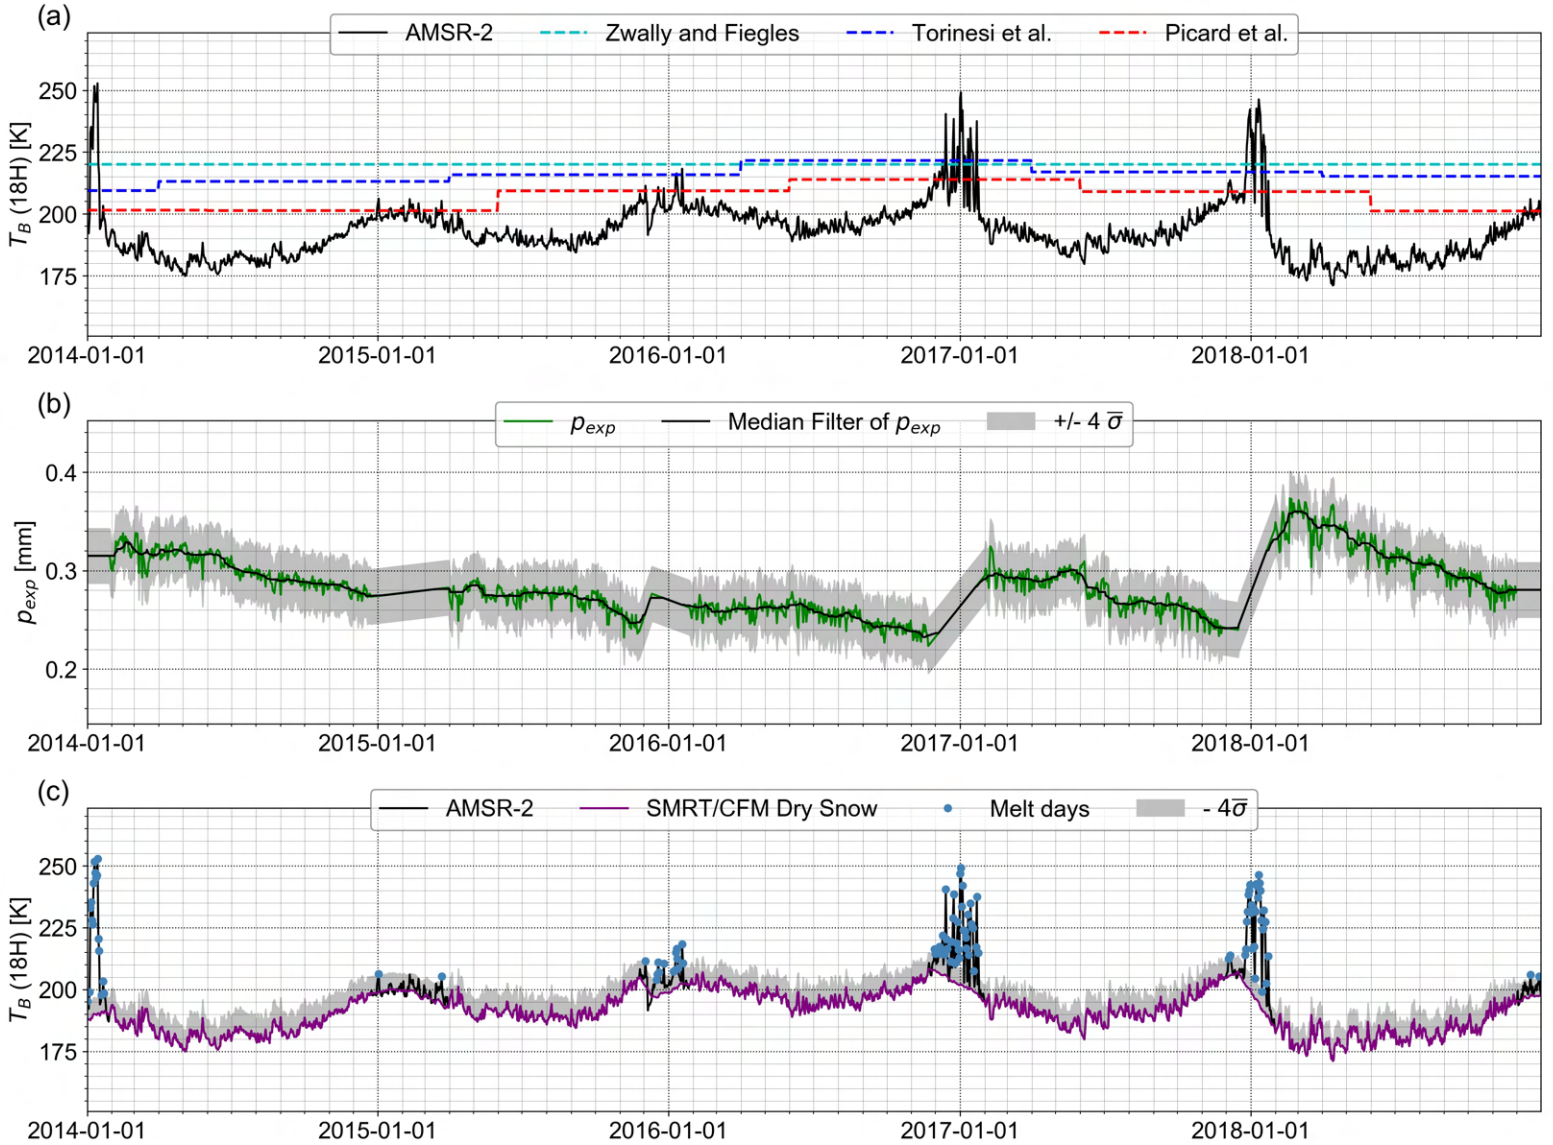

Site: AWS 4, Channel: 18V

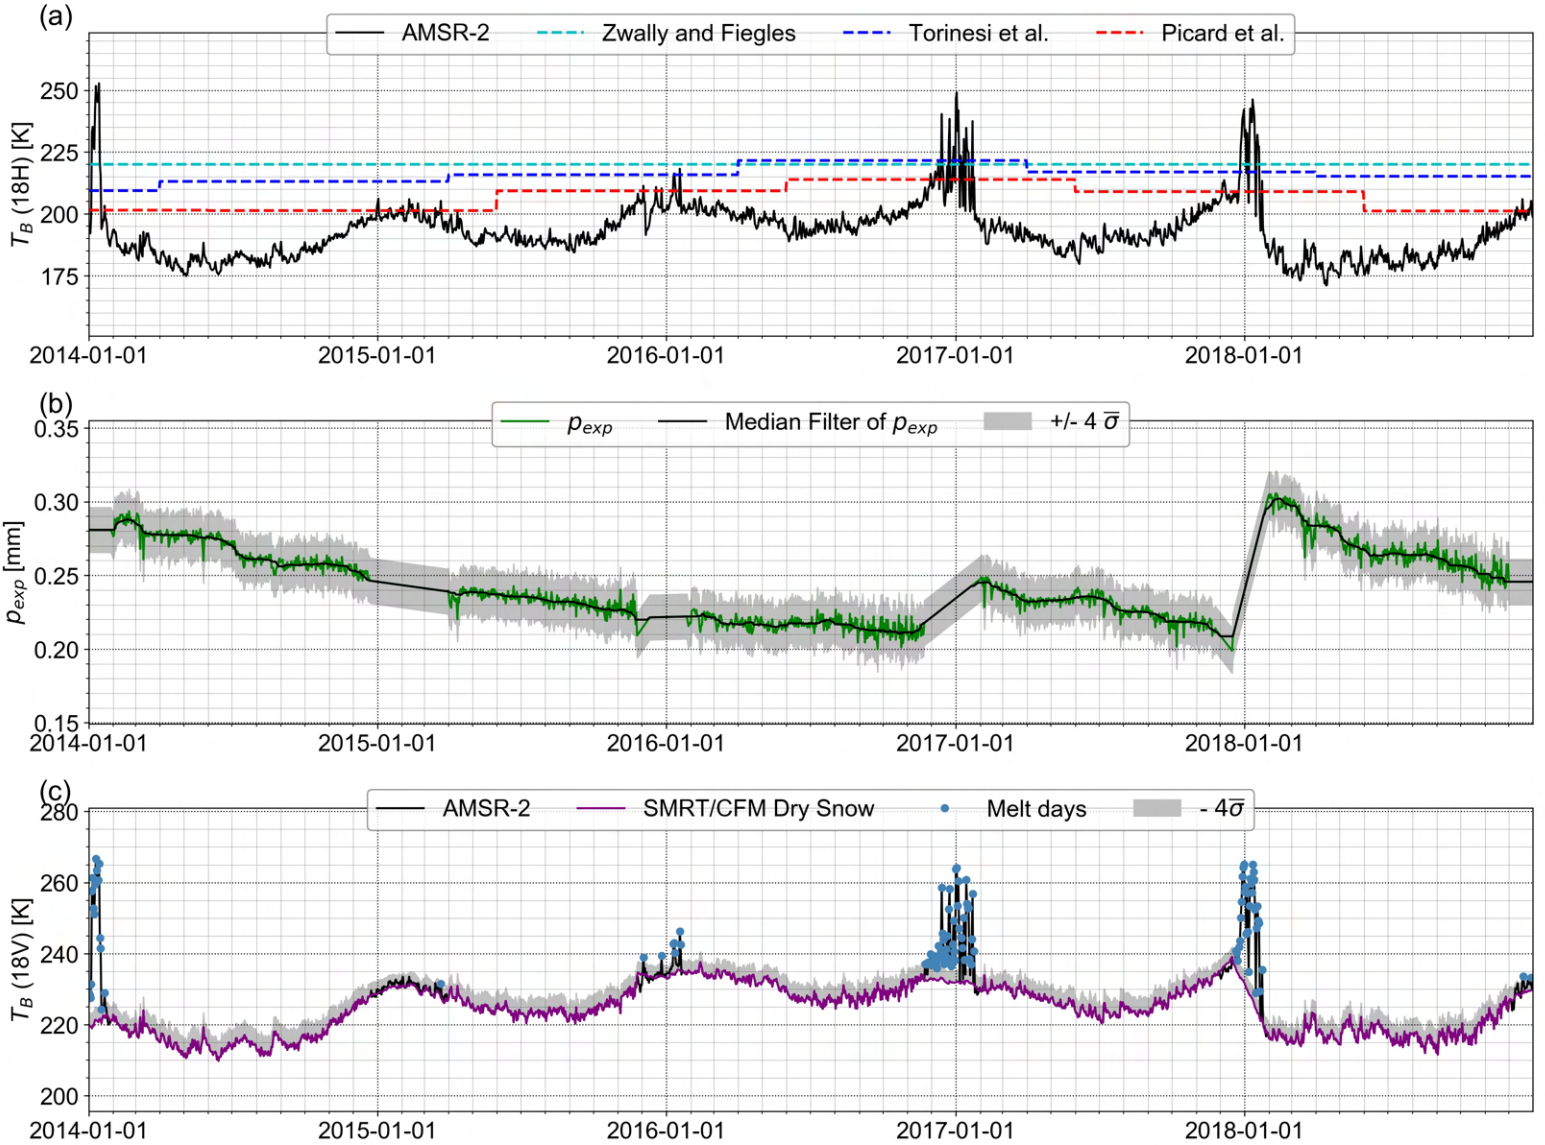



Site: AWS 11, Channel: 18H

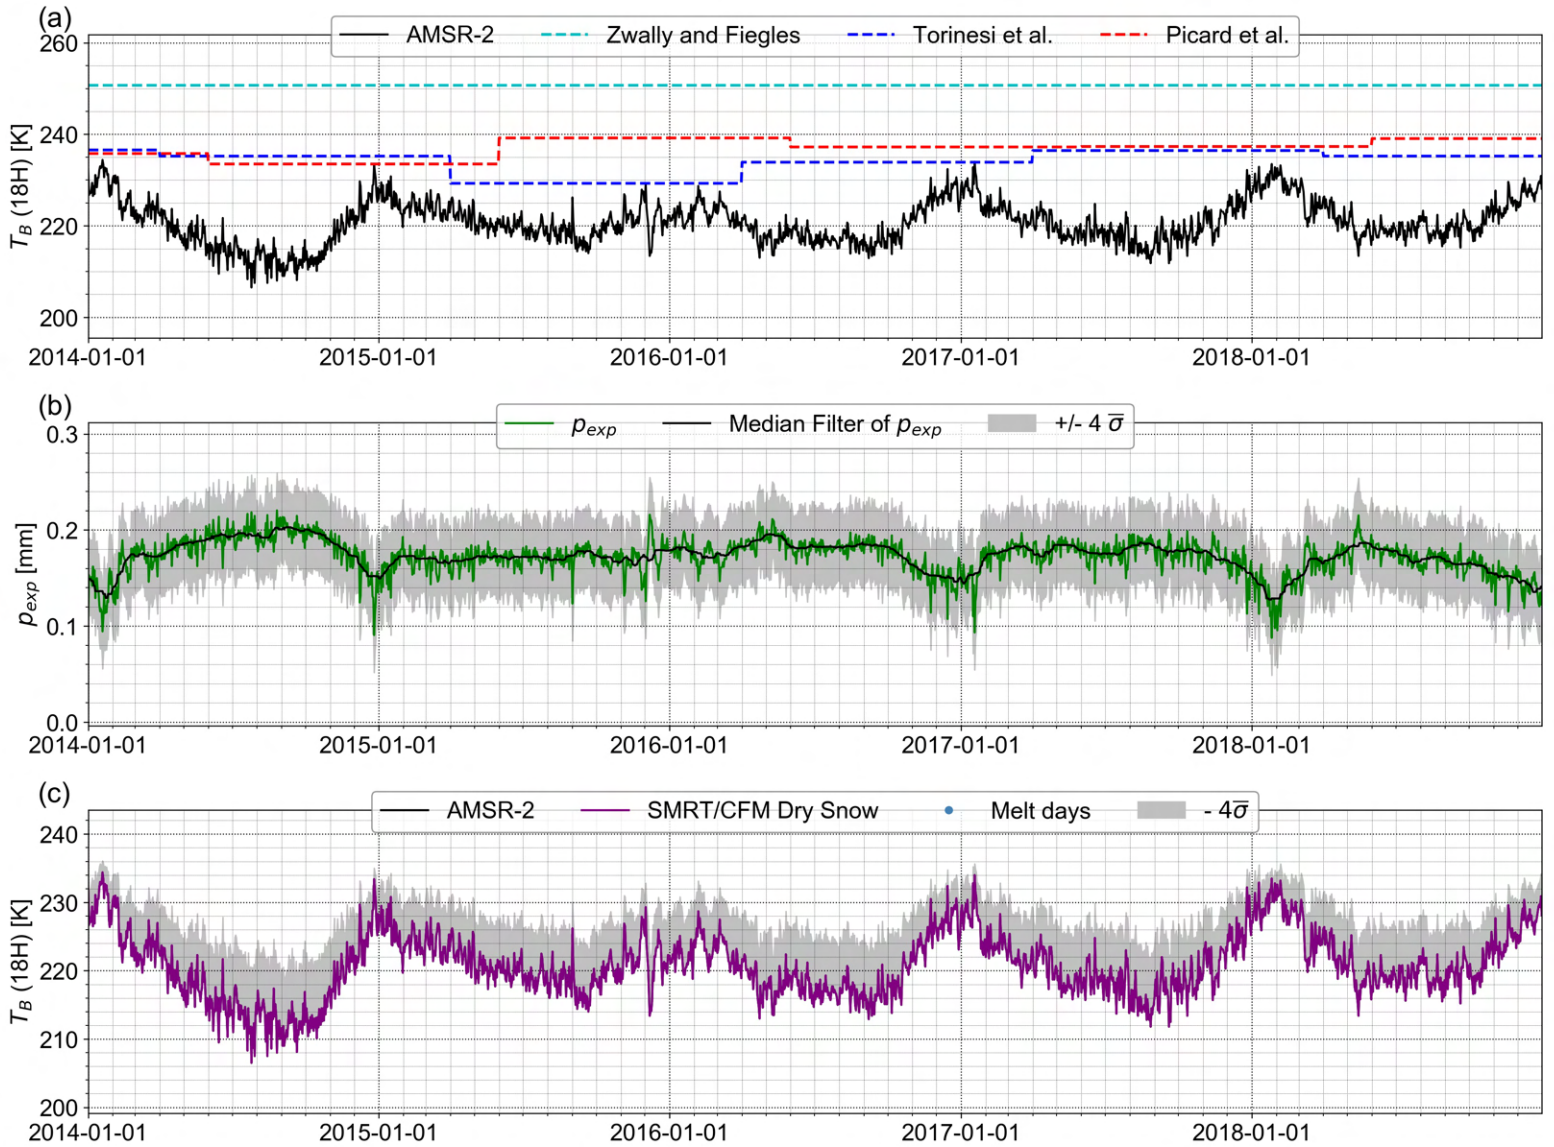

Site: AWS 11, Channel: 18V

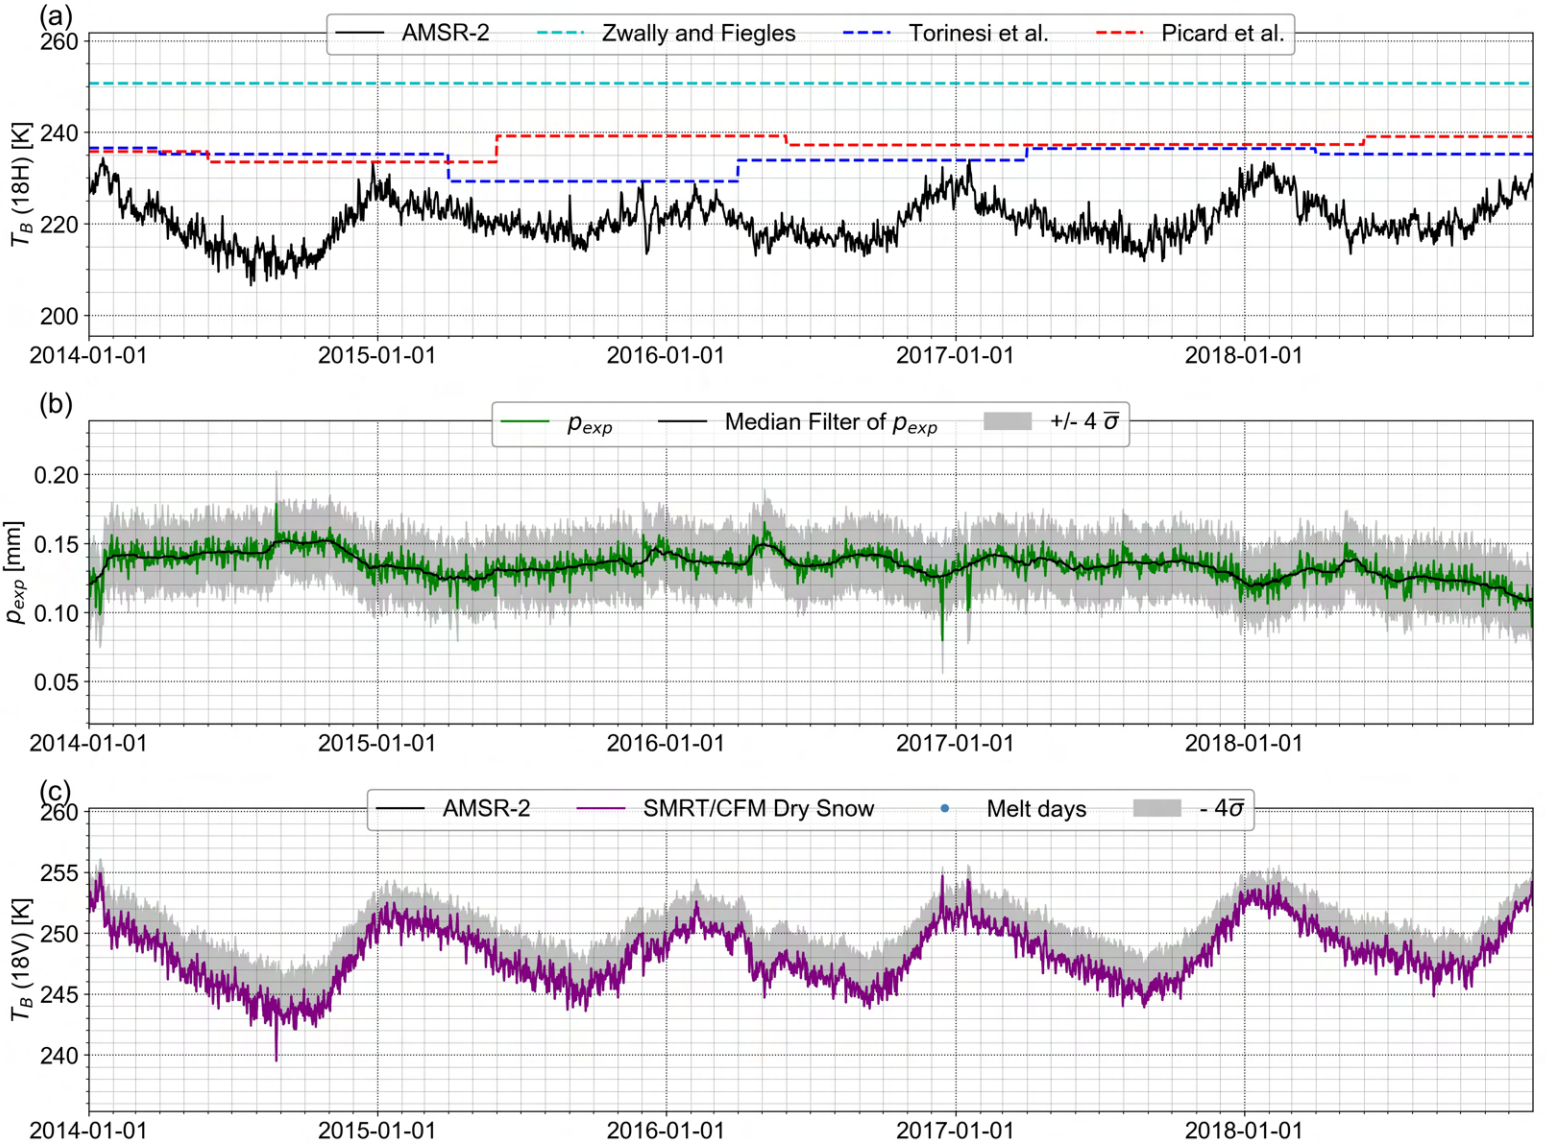

Site: AWS 6, Channel: 18H

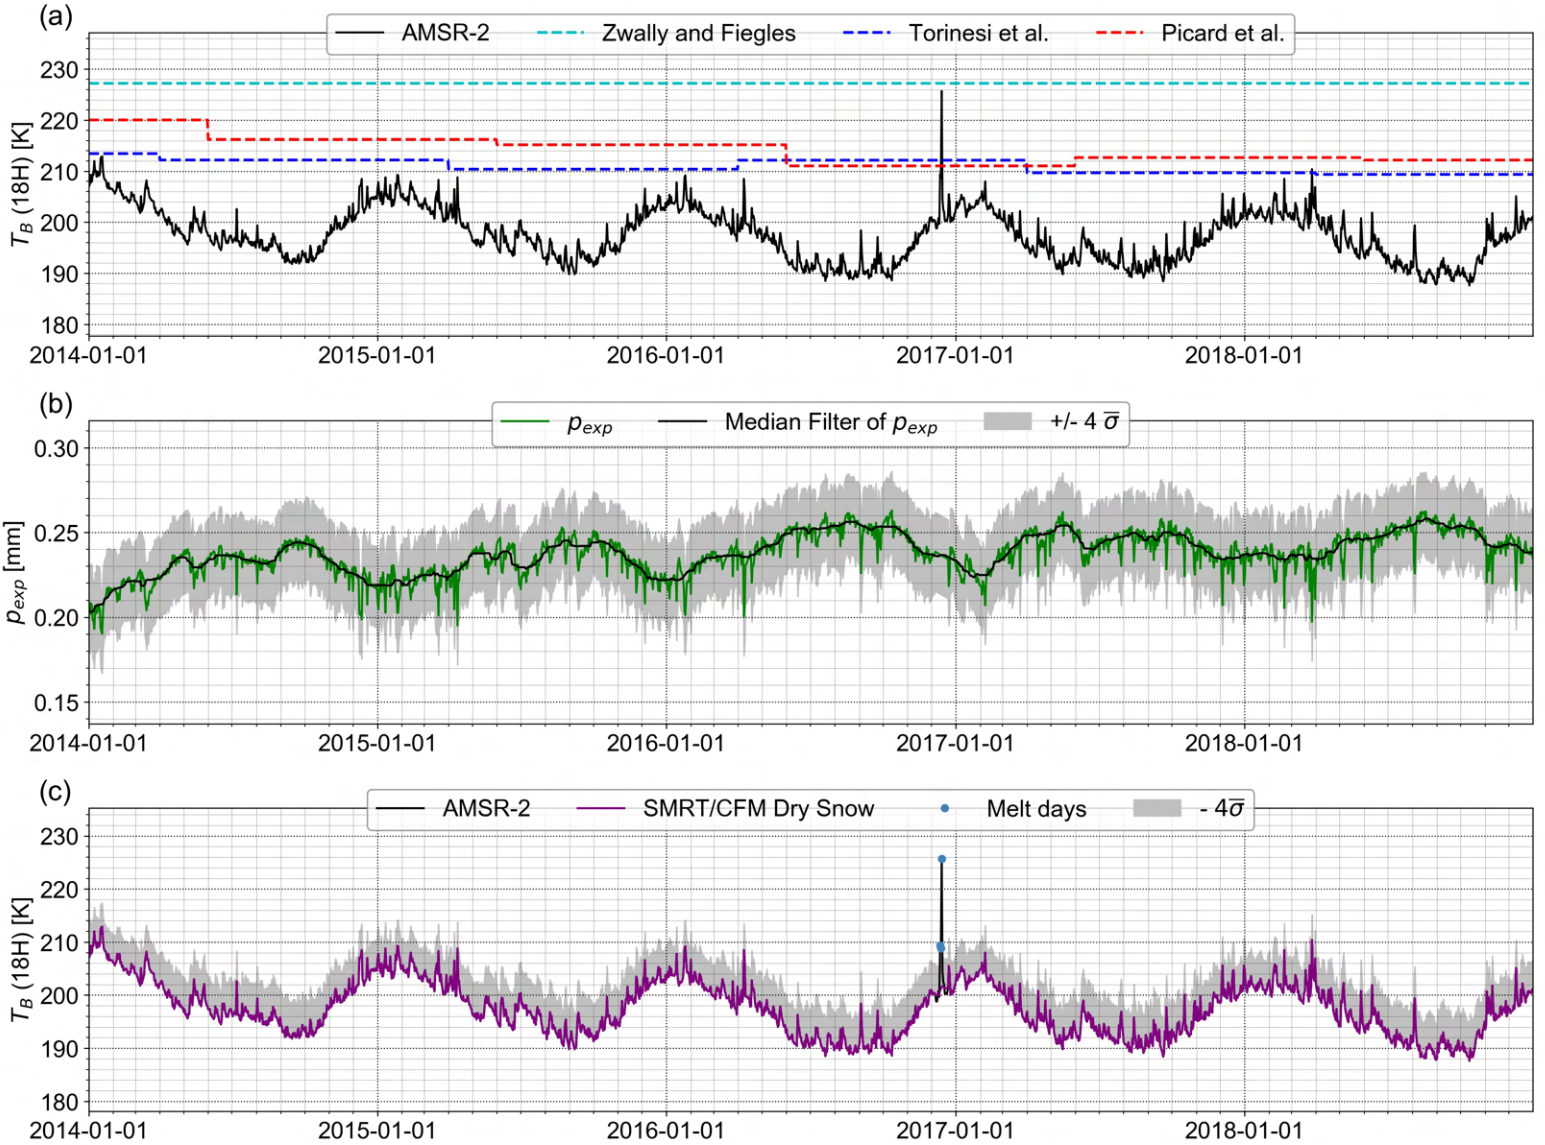

Site: AWS 6, Channel: 18V

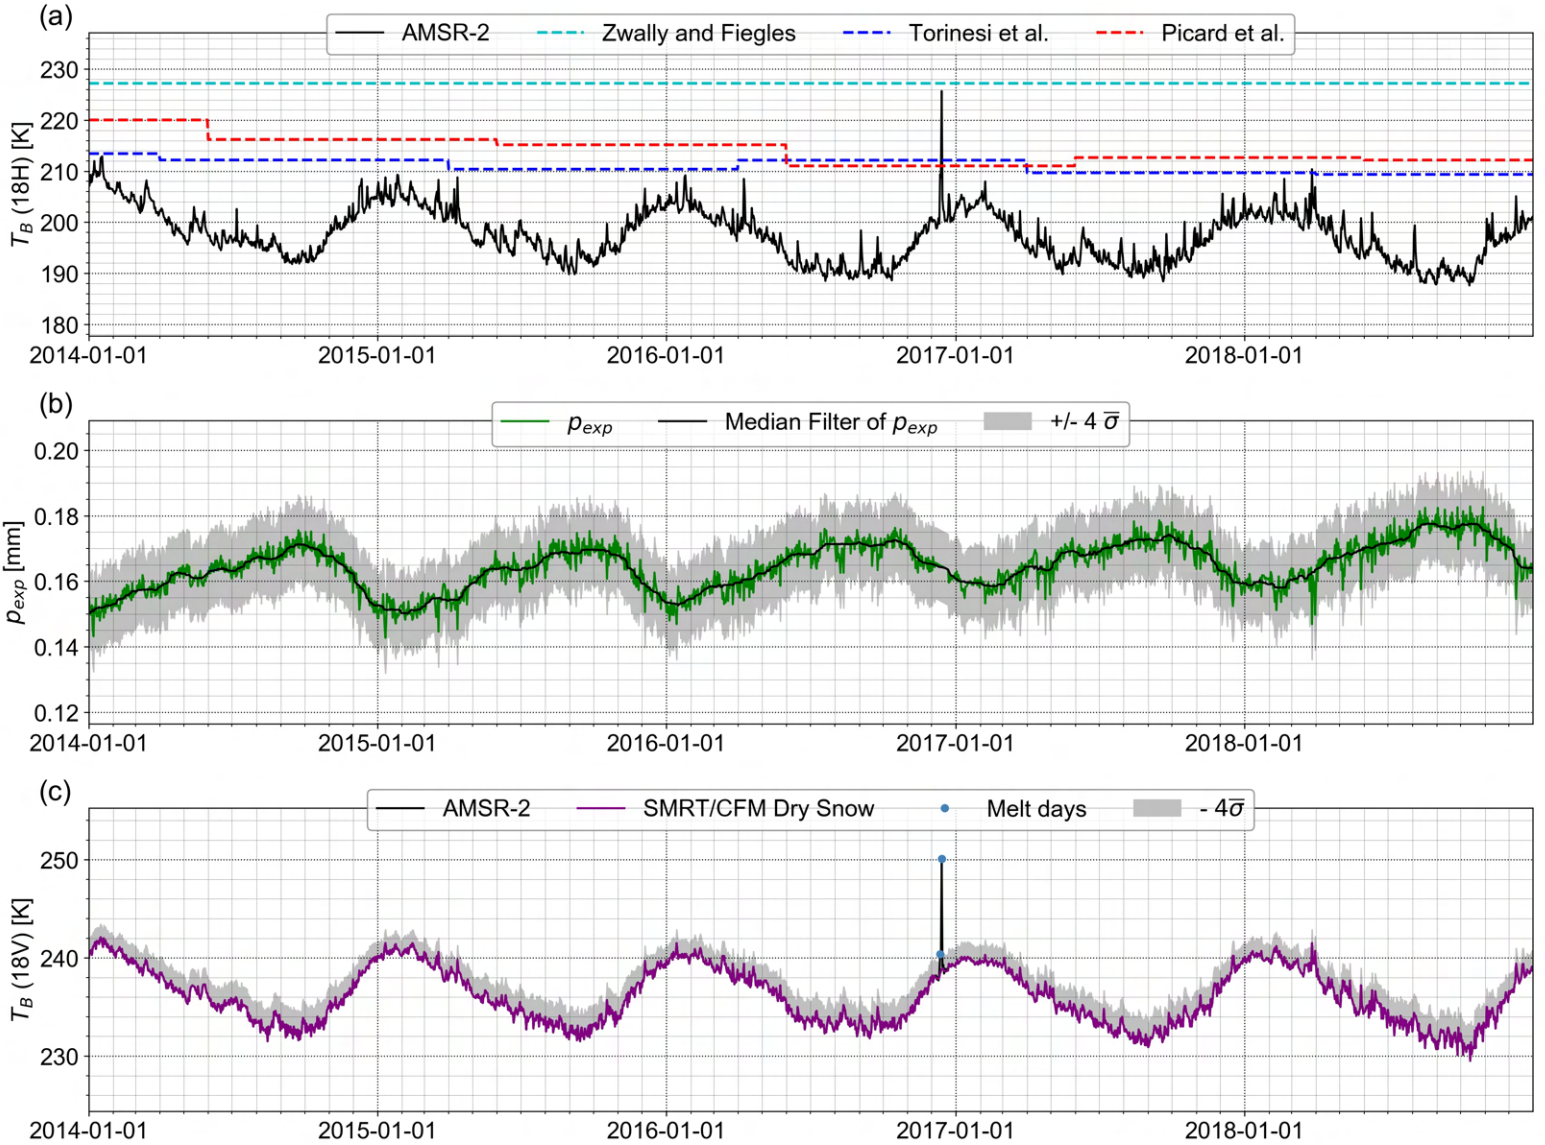

Site: AWS 14, Channel: 18H

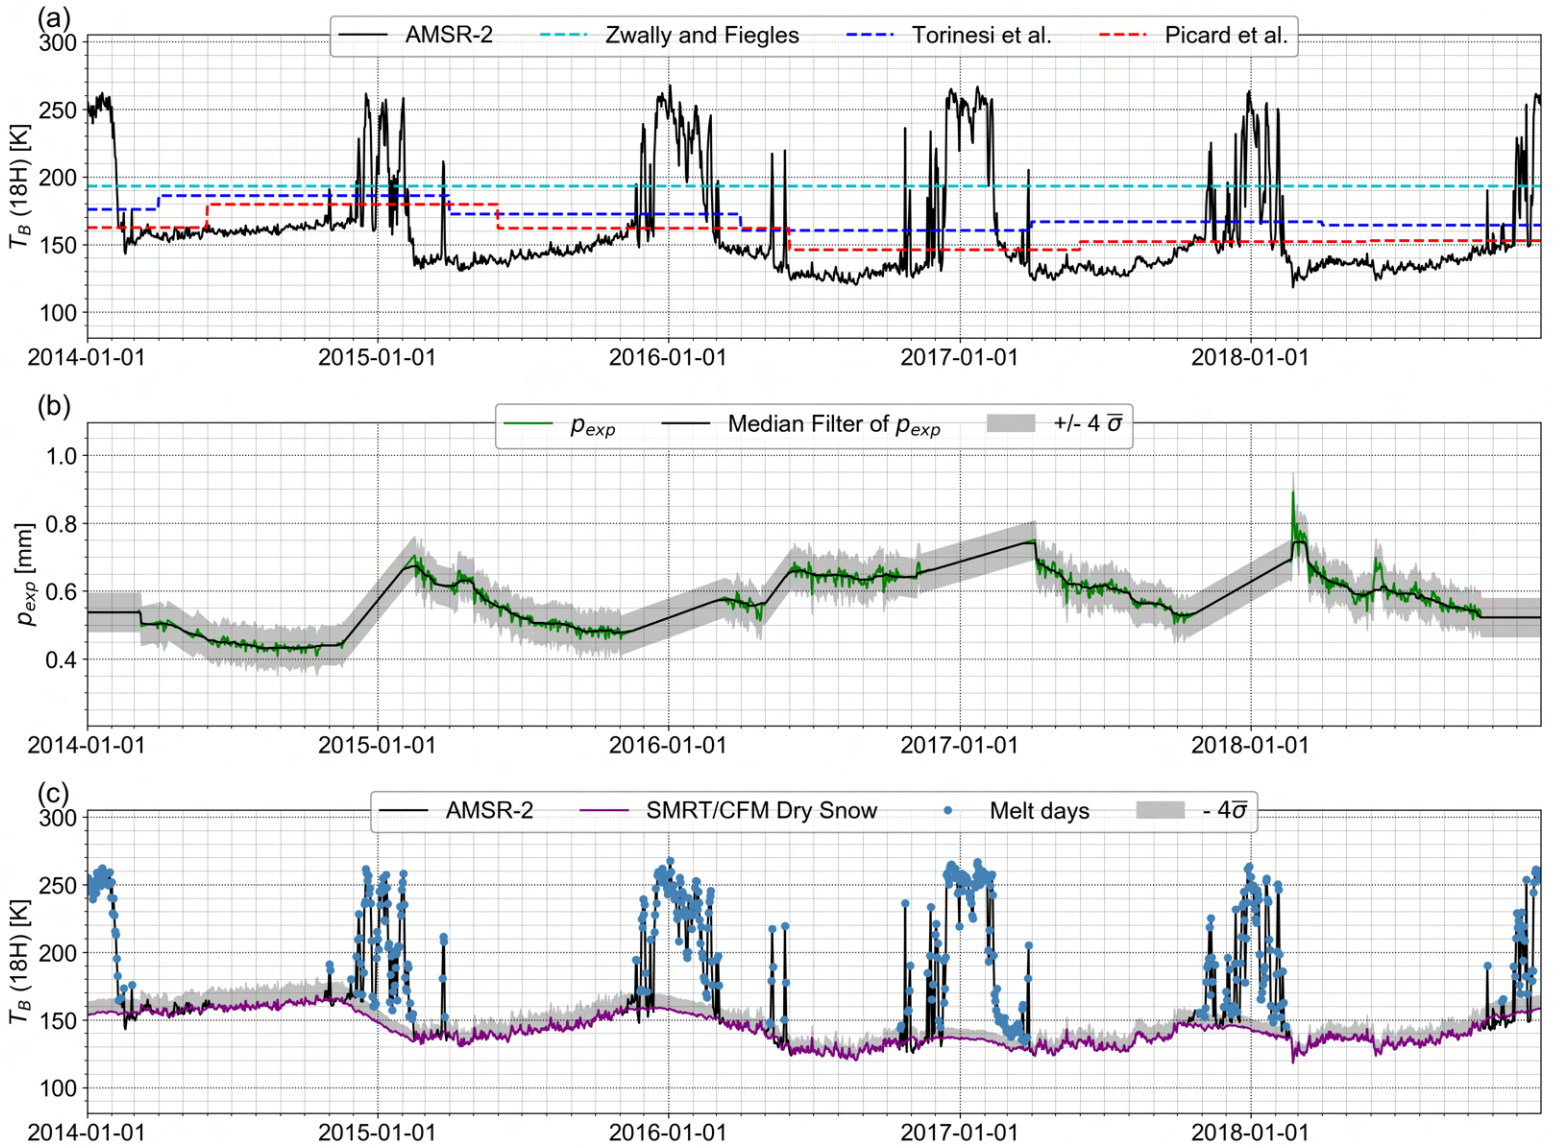

Site: AWS 14, Channel: 18V

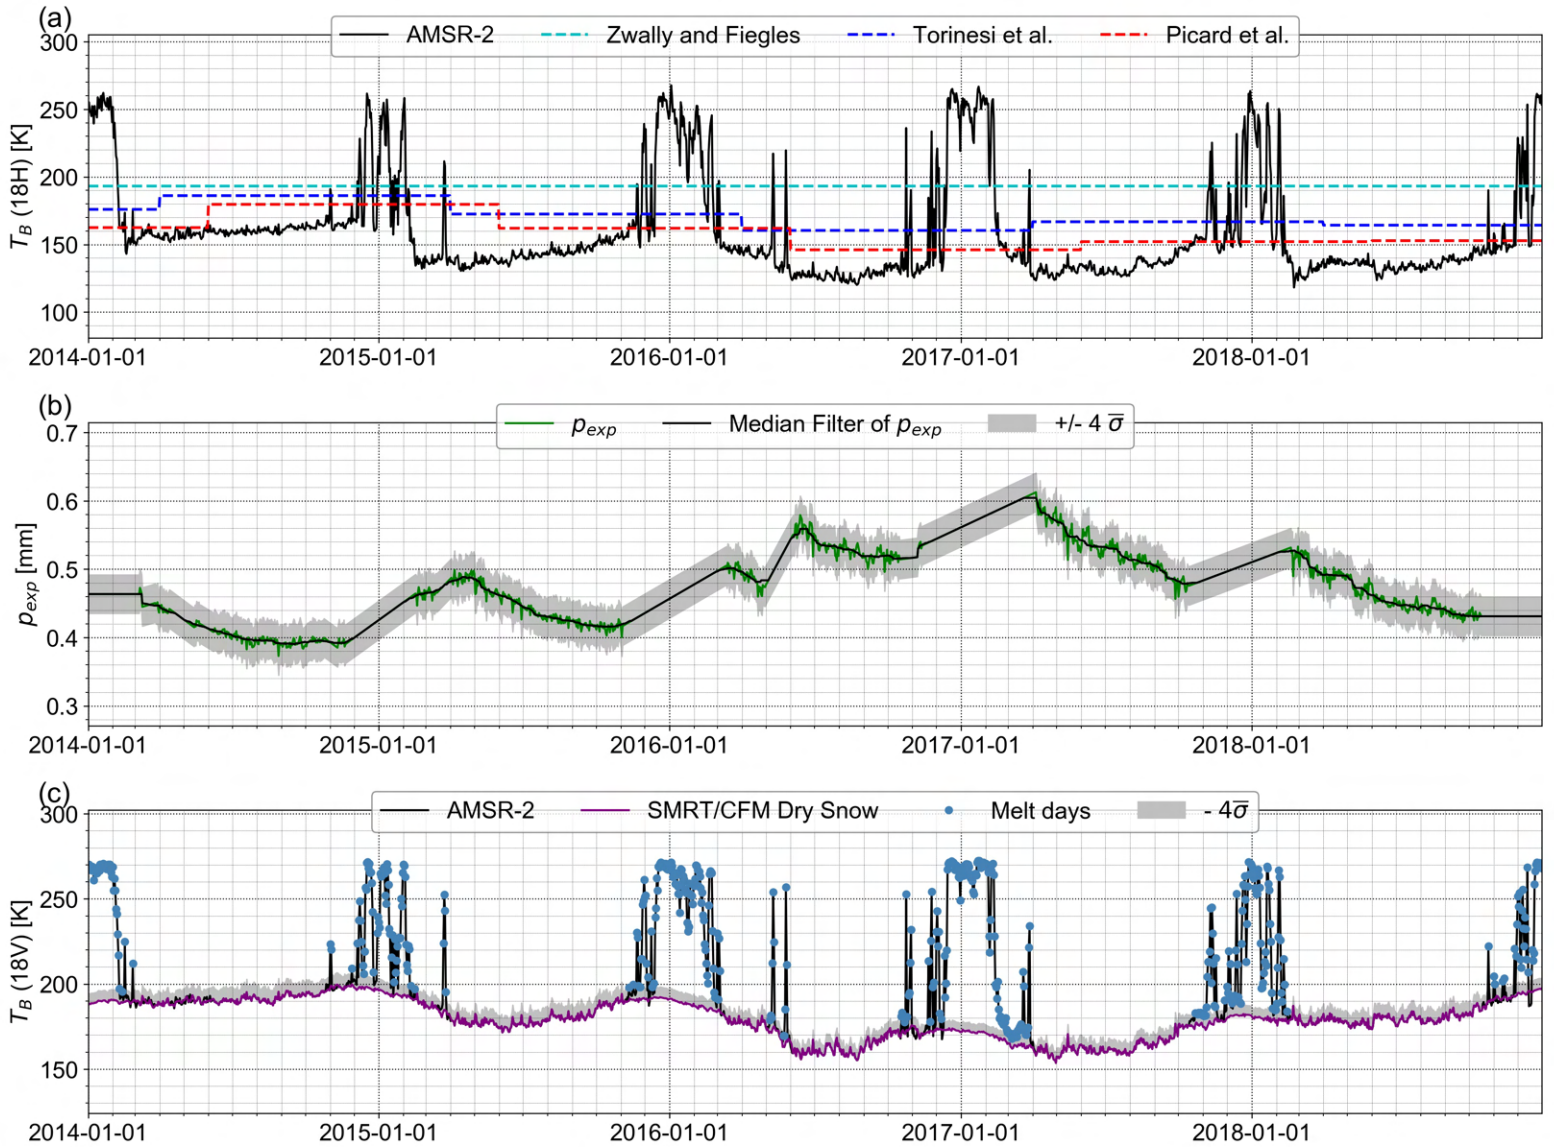

Site: AWS 17, Channel: 18H

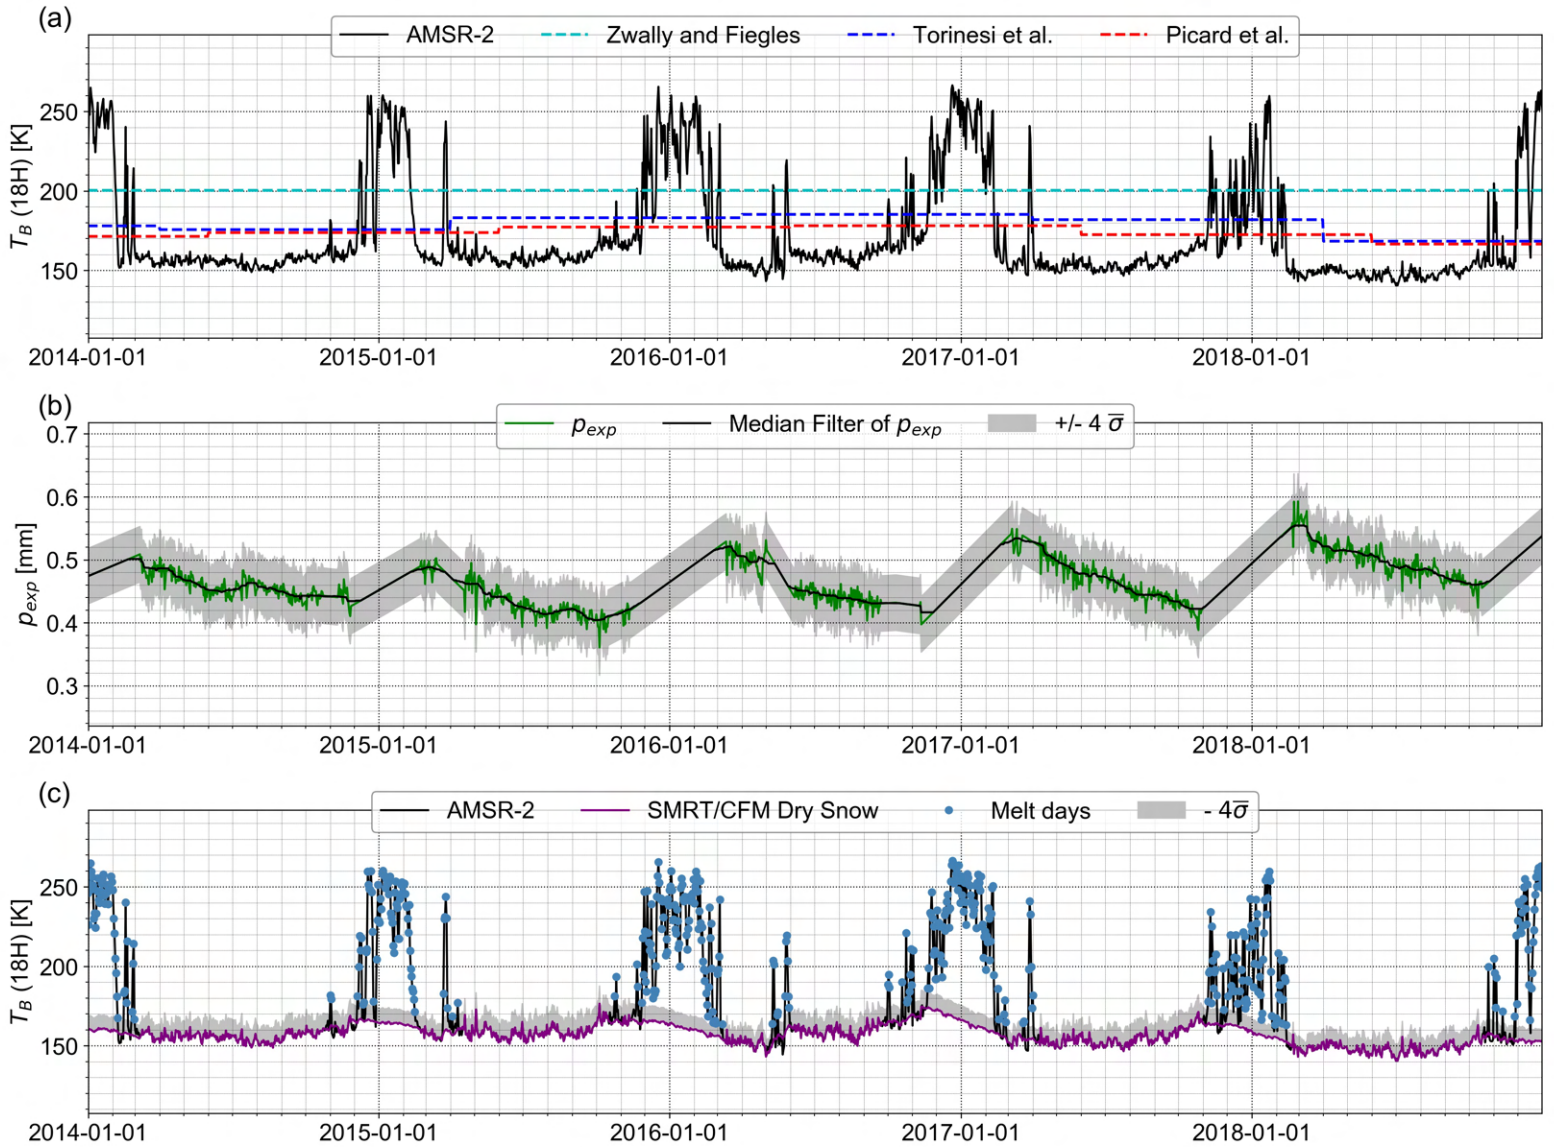

Site: AWS 17, Channel: 18V

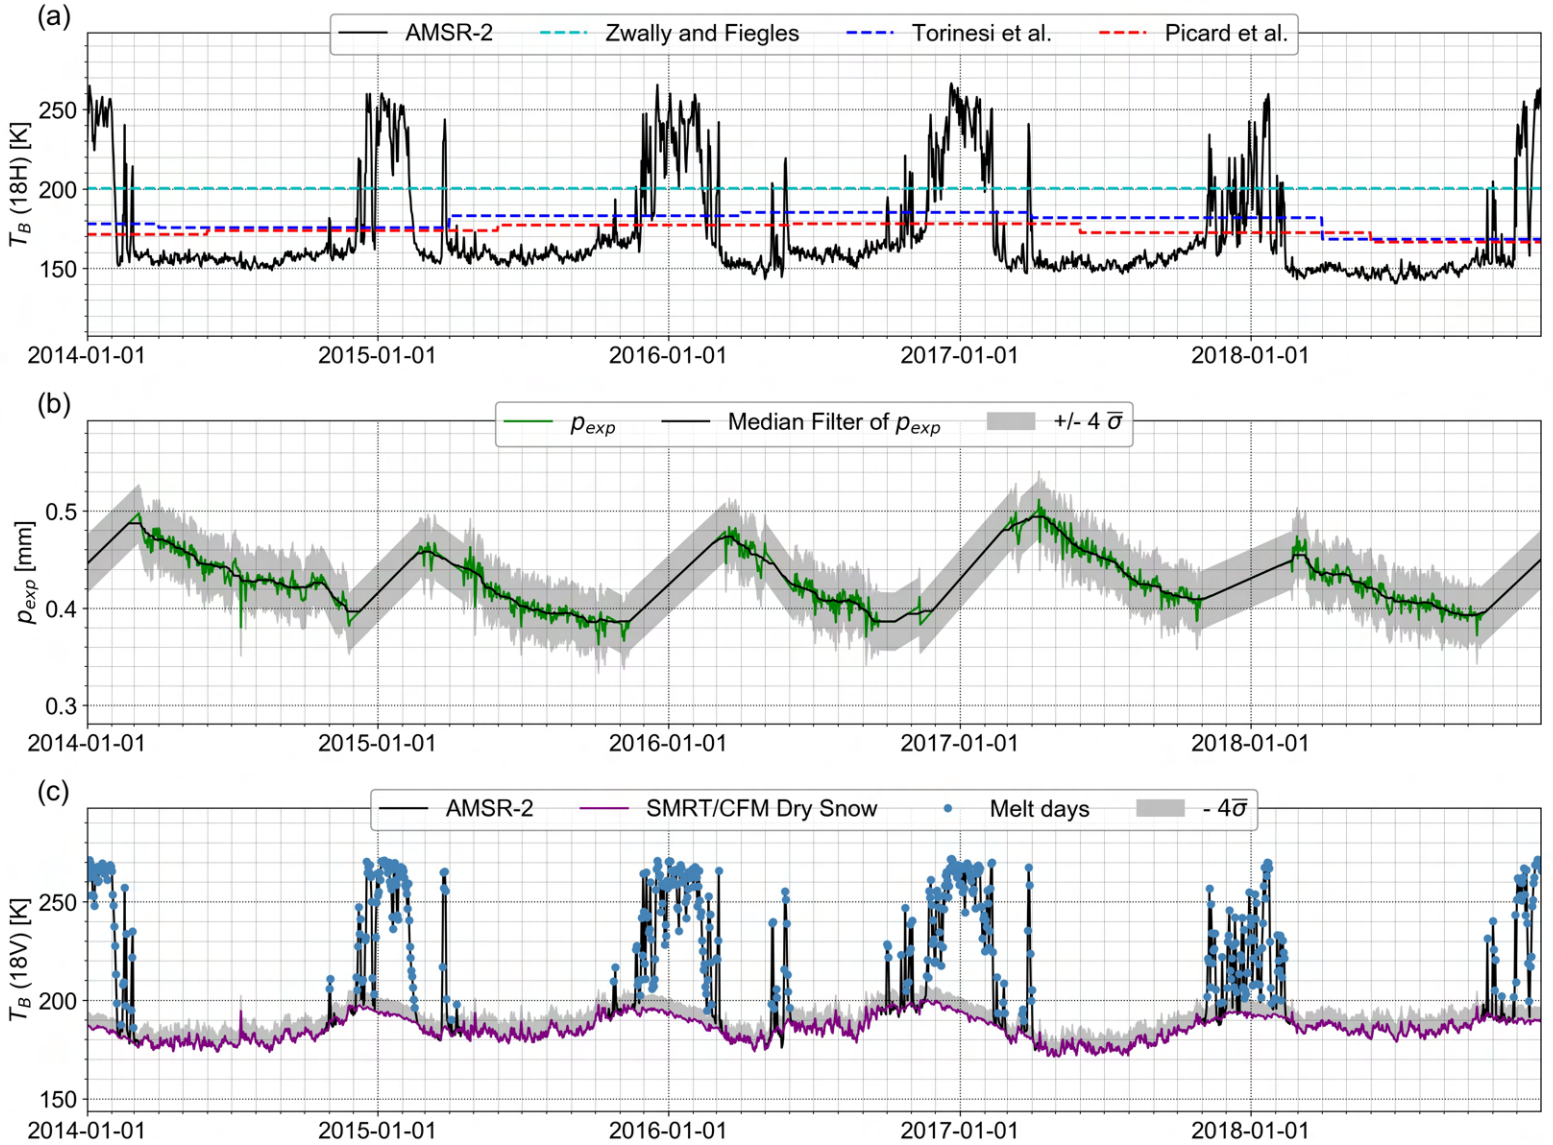



Site: Dome C, Channel: 18H

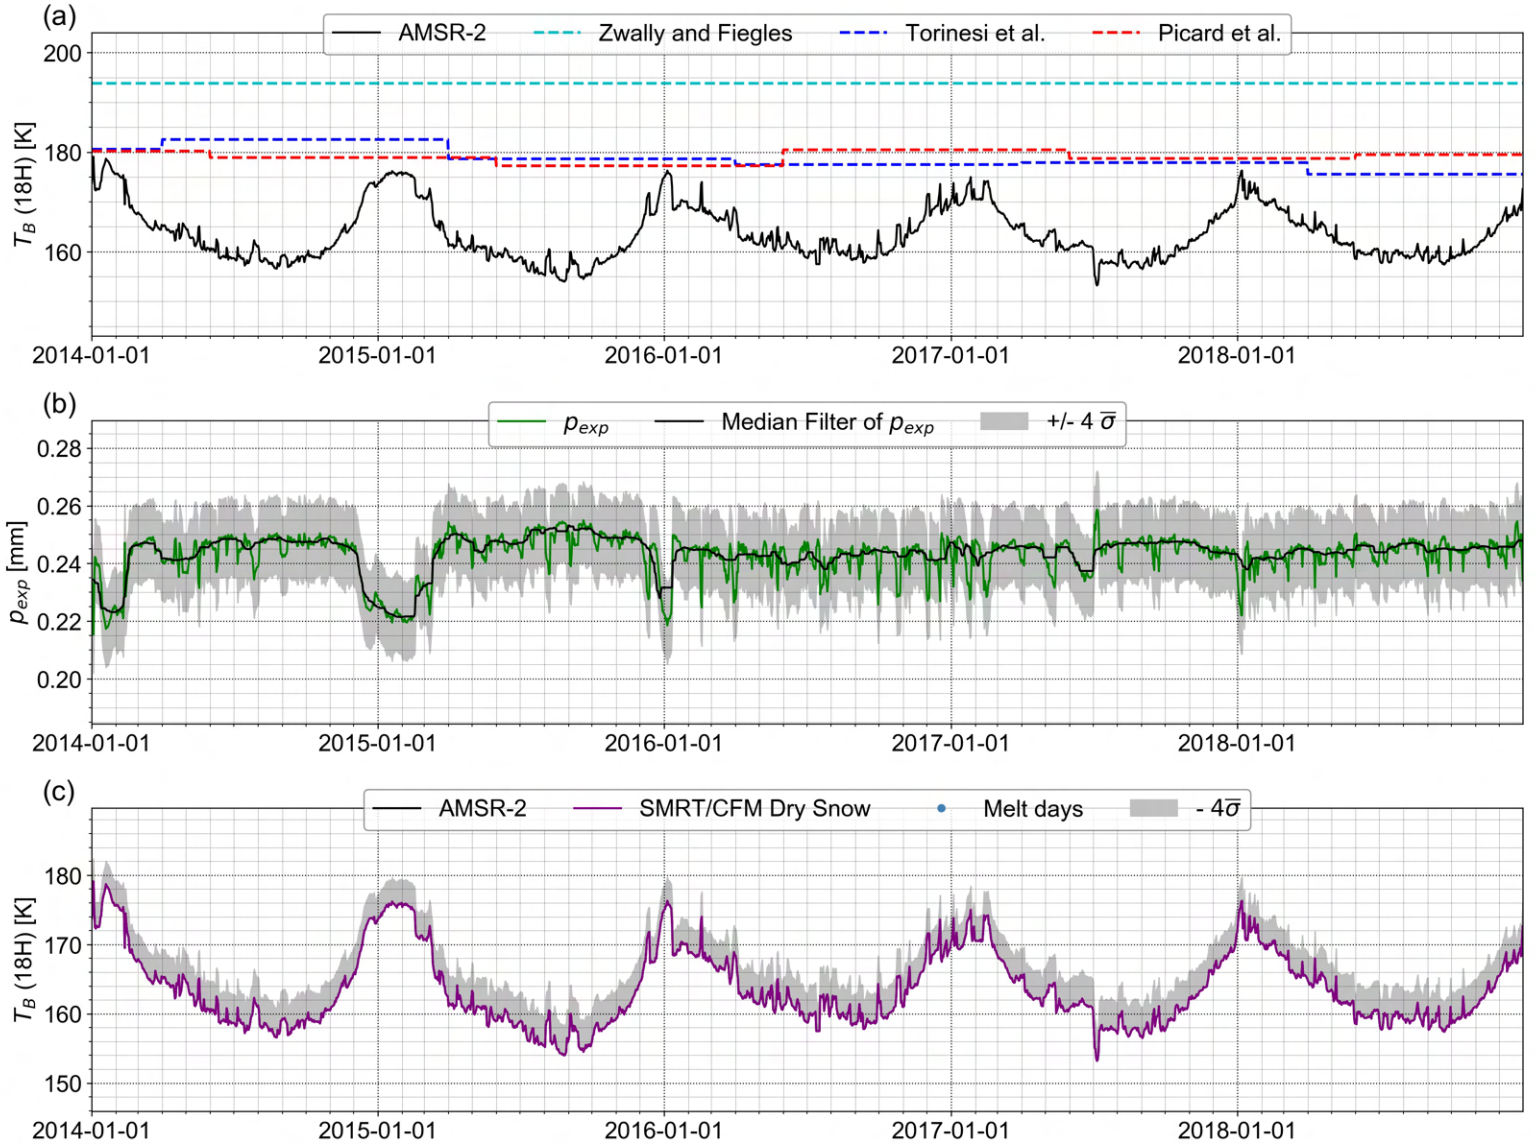

Site: Dome C, Channel: 18V

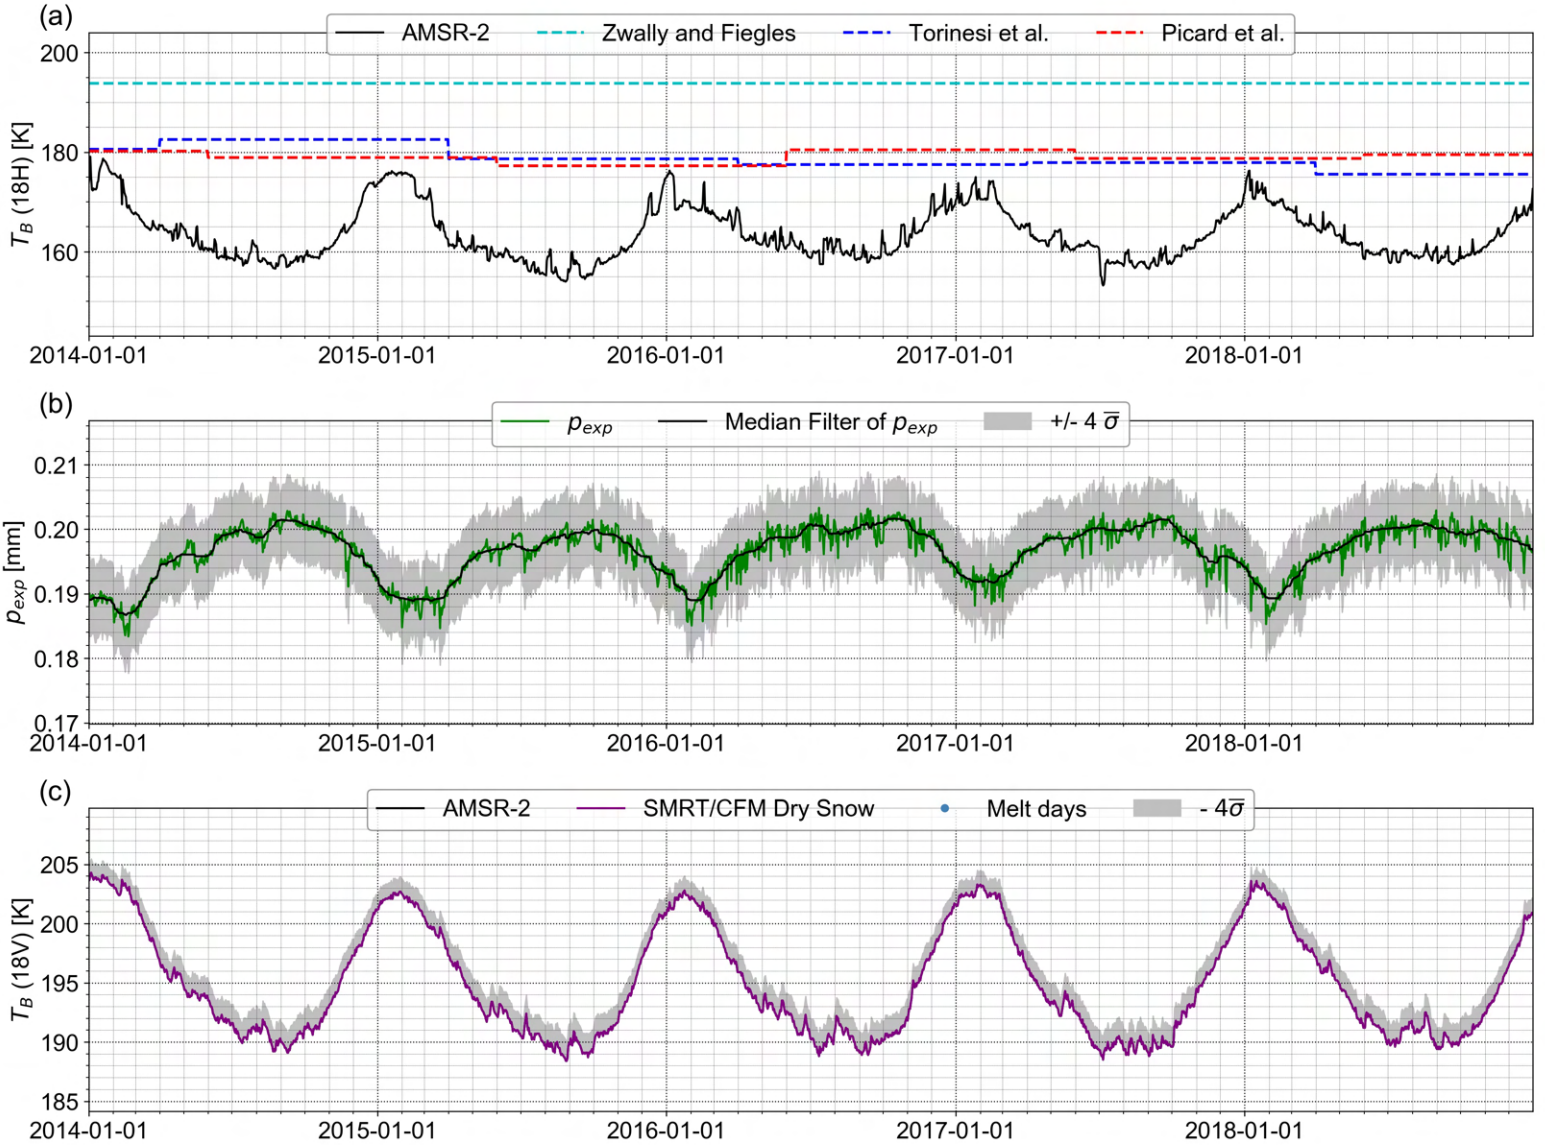

Site: Point Barnola, Channel: 18H

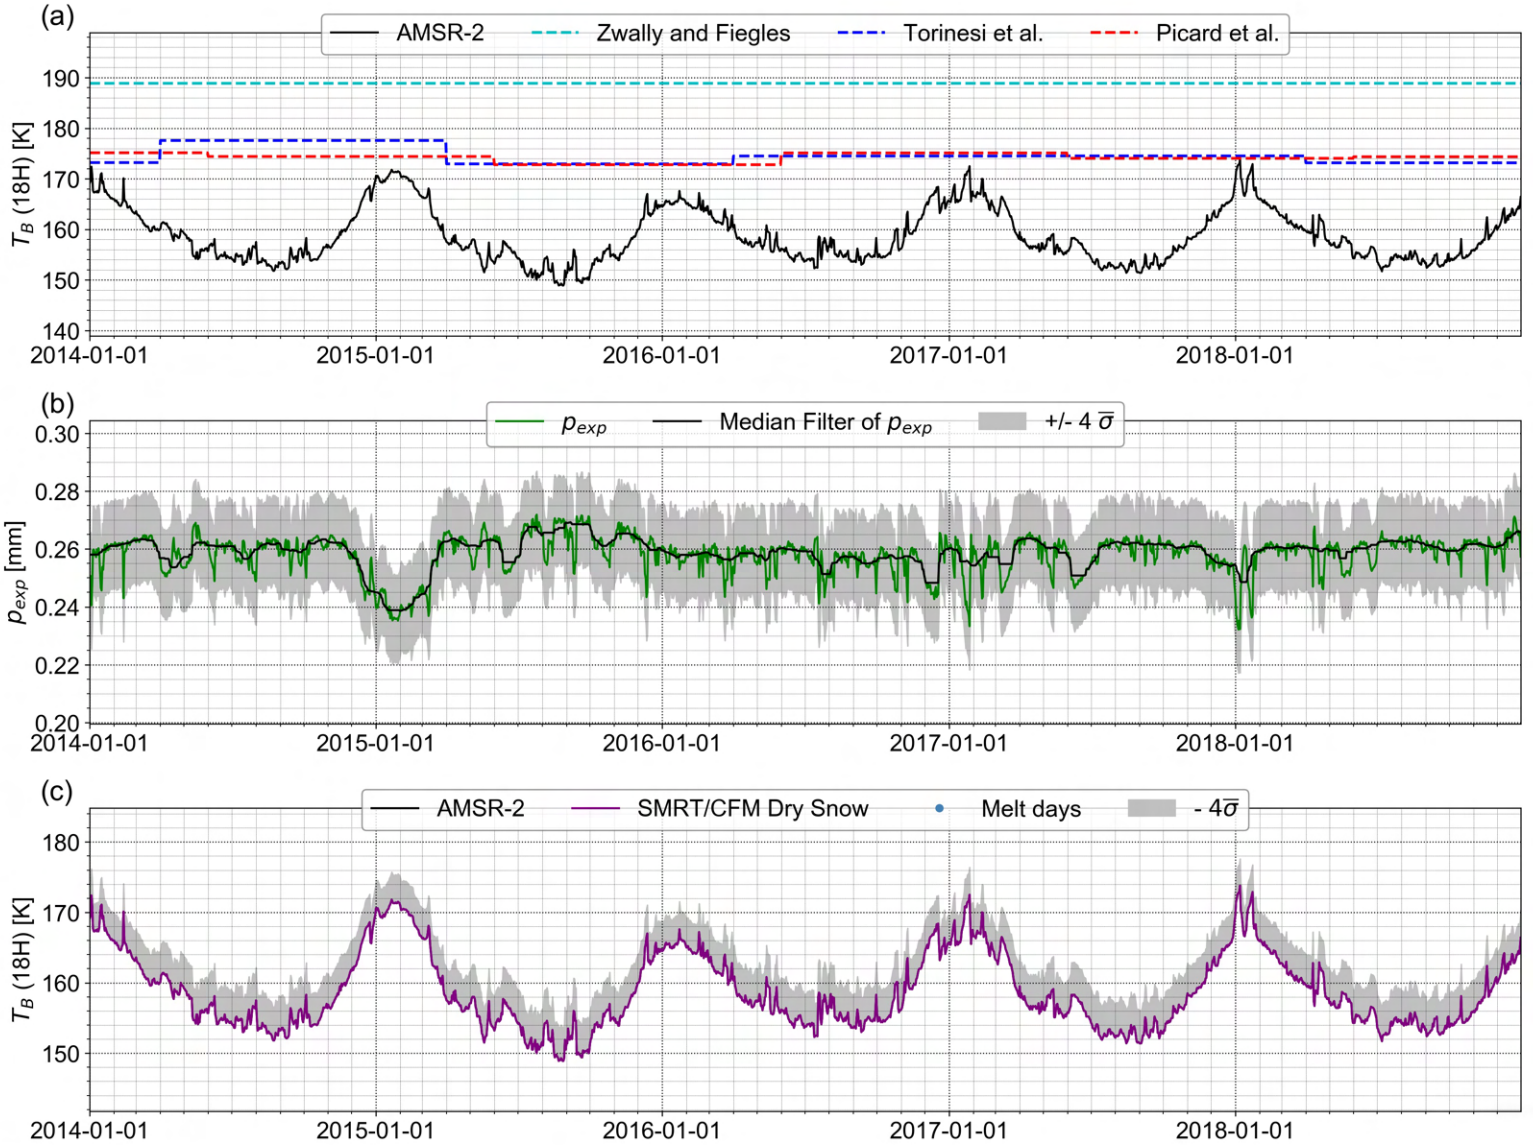

Site: Point Barnola, Channel: 18V

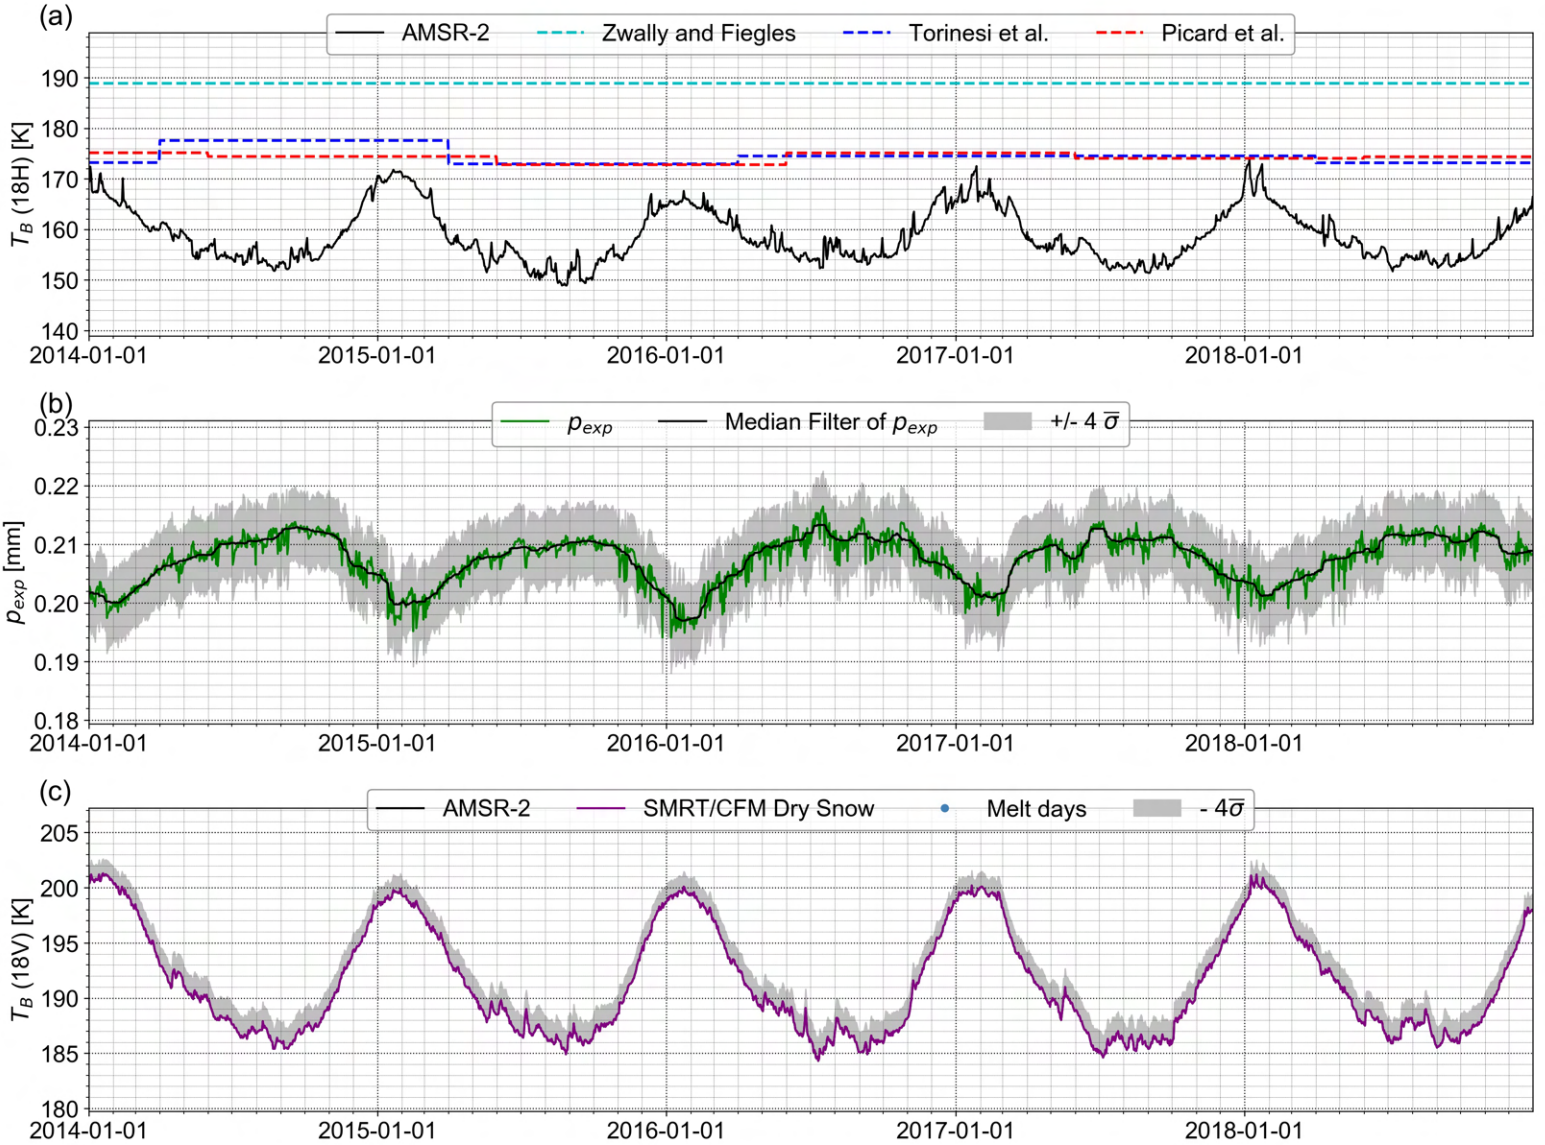

Site: Kohnen, Channel: 18H

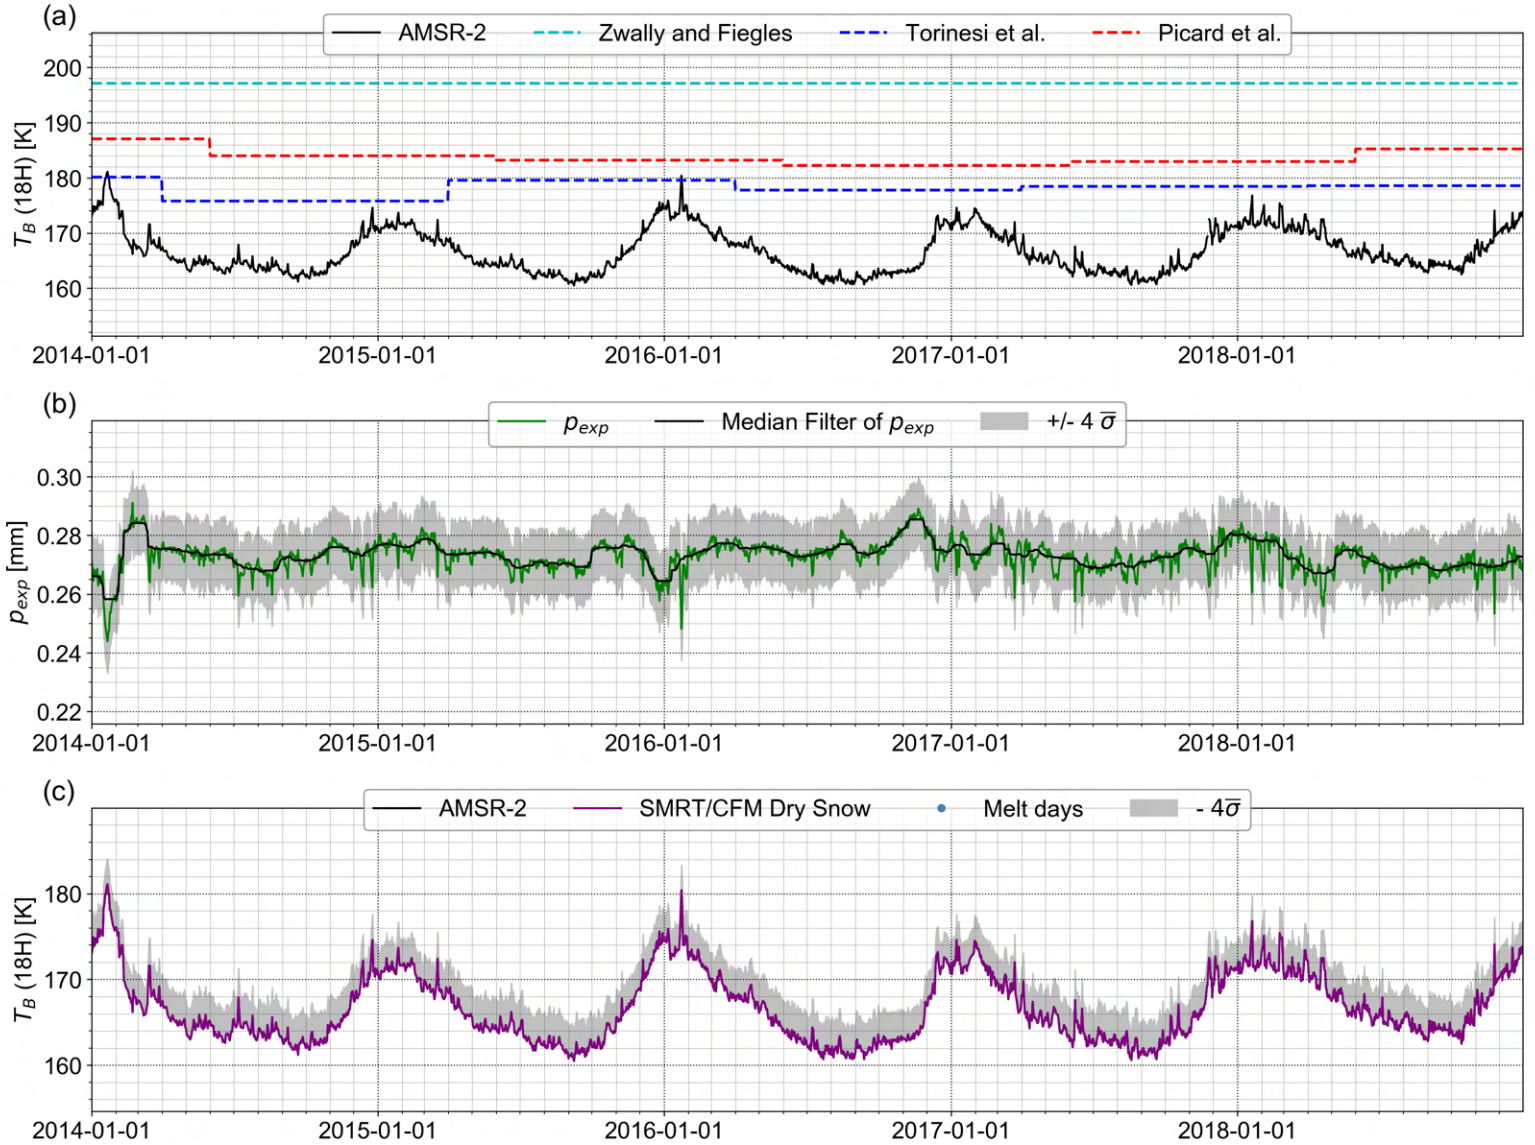

Site: Kohnen, Channel: 18V

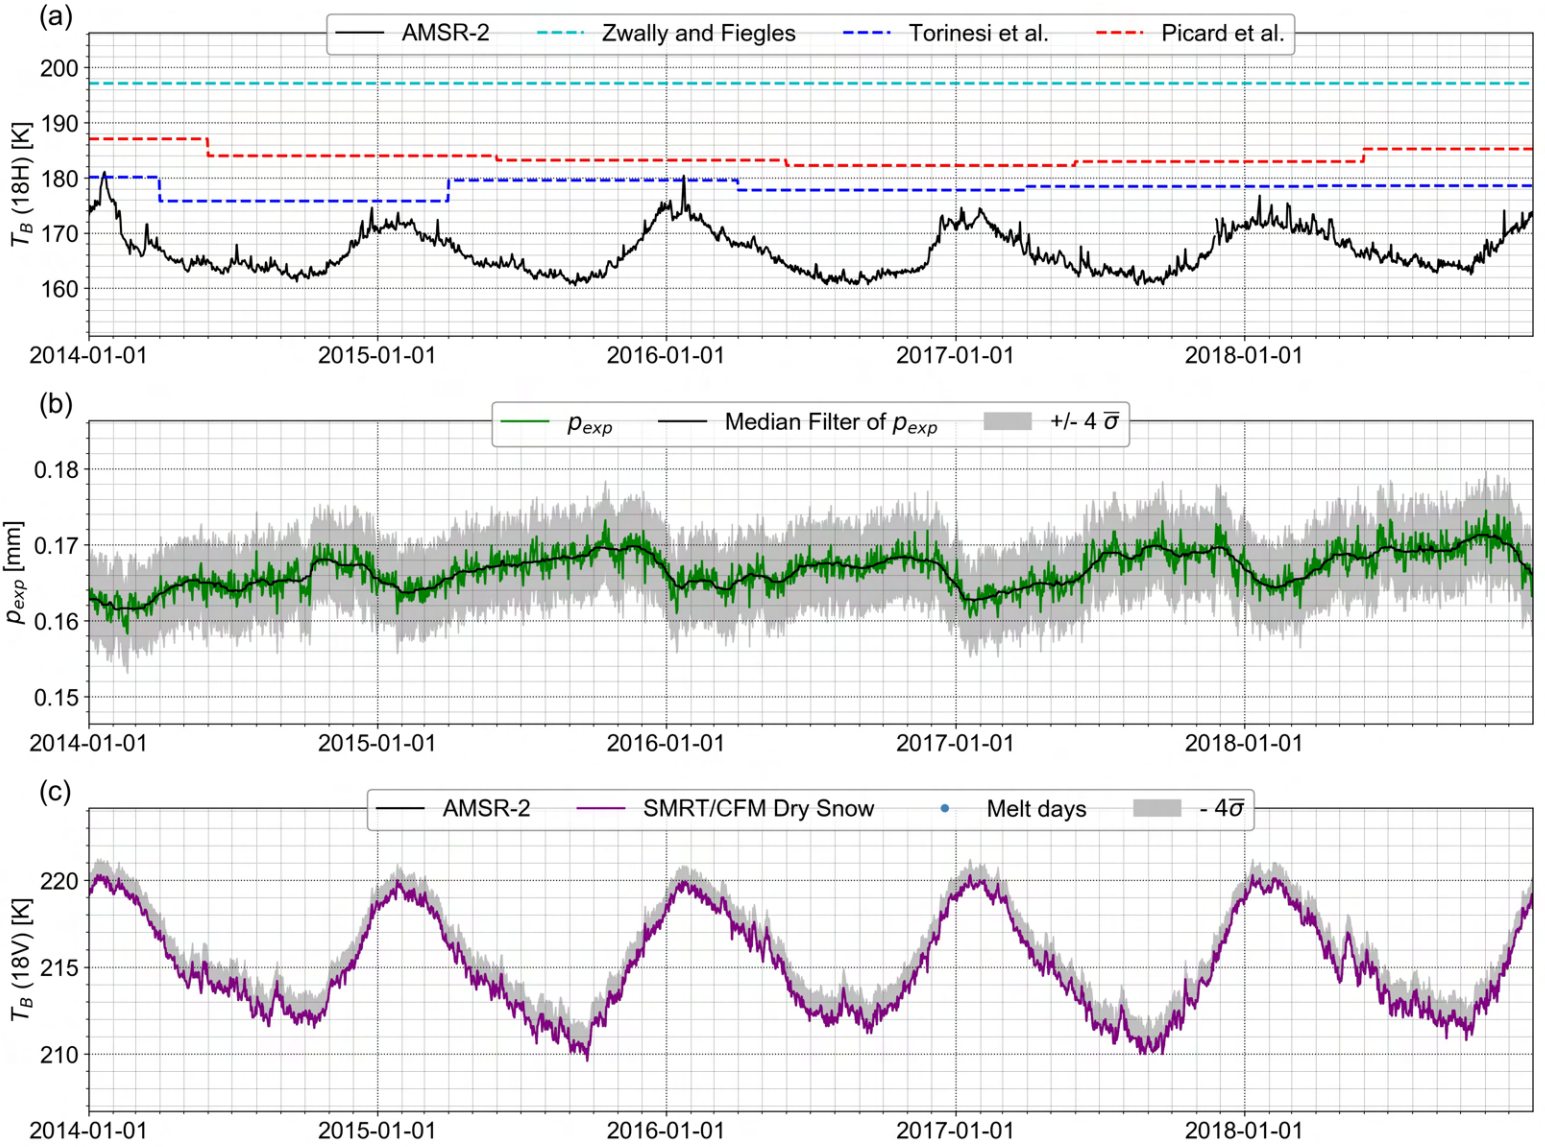

Site: AWS 16, Channel: 18H

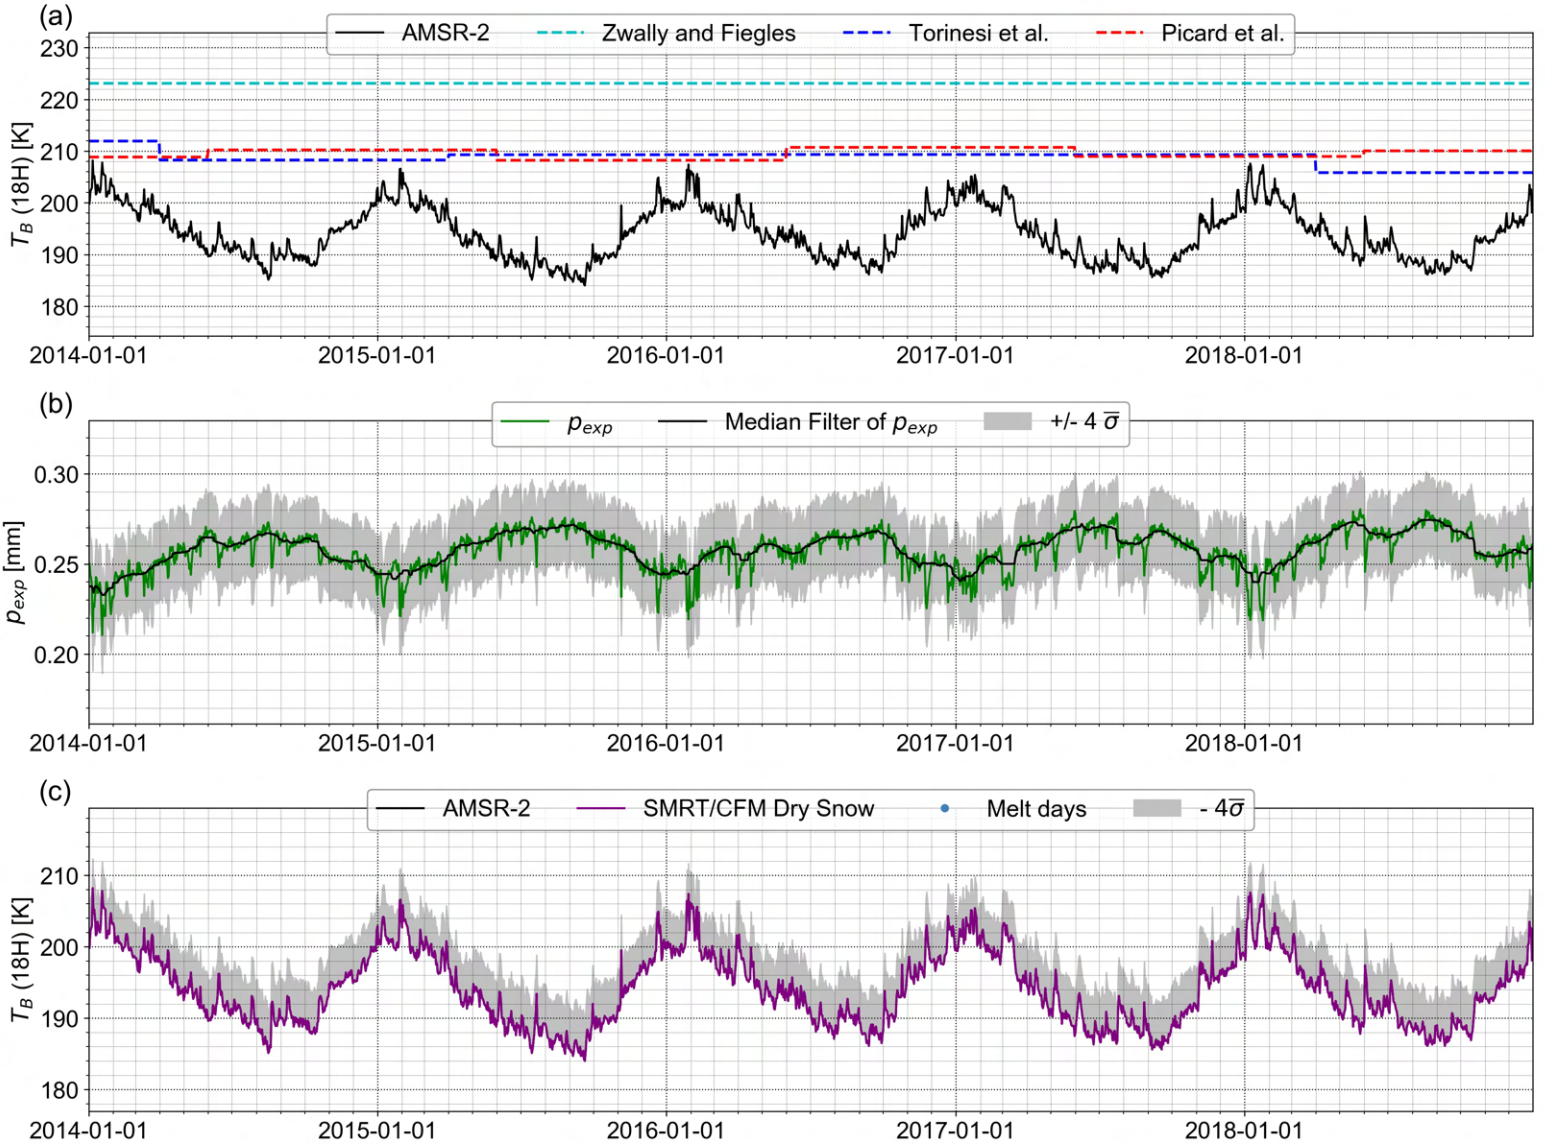

Site: AWS 16, Channel: 18V

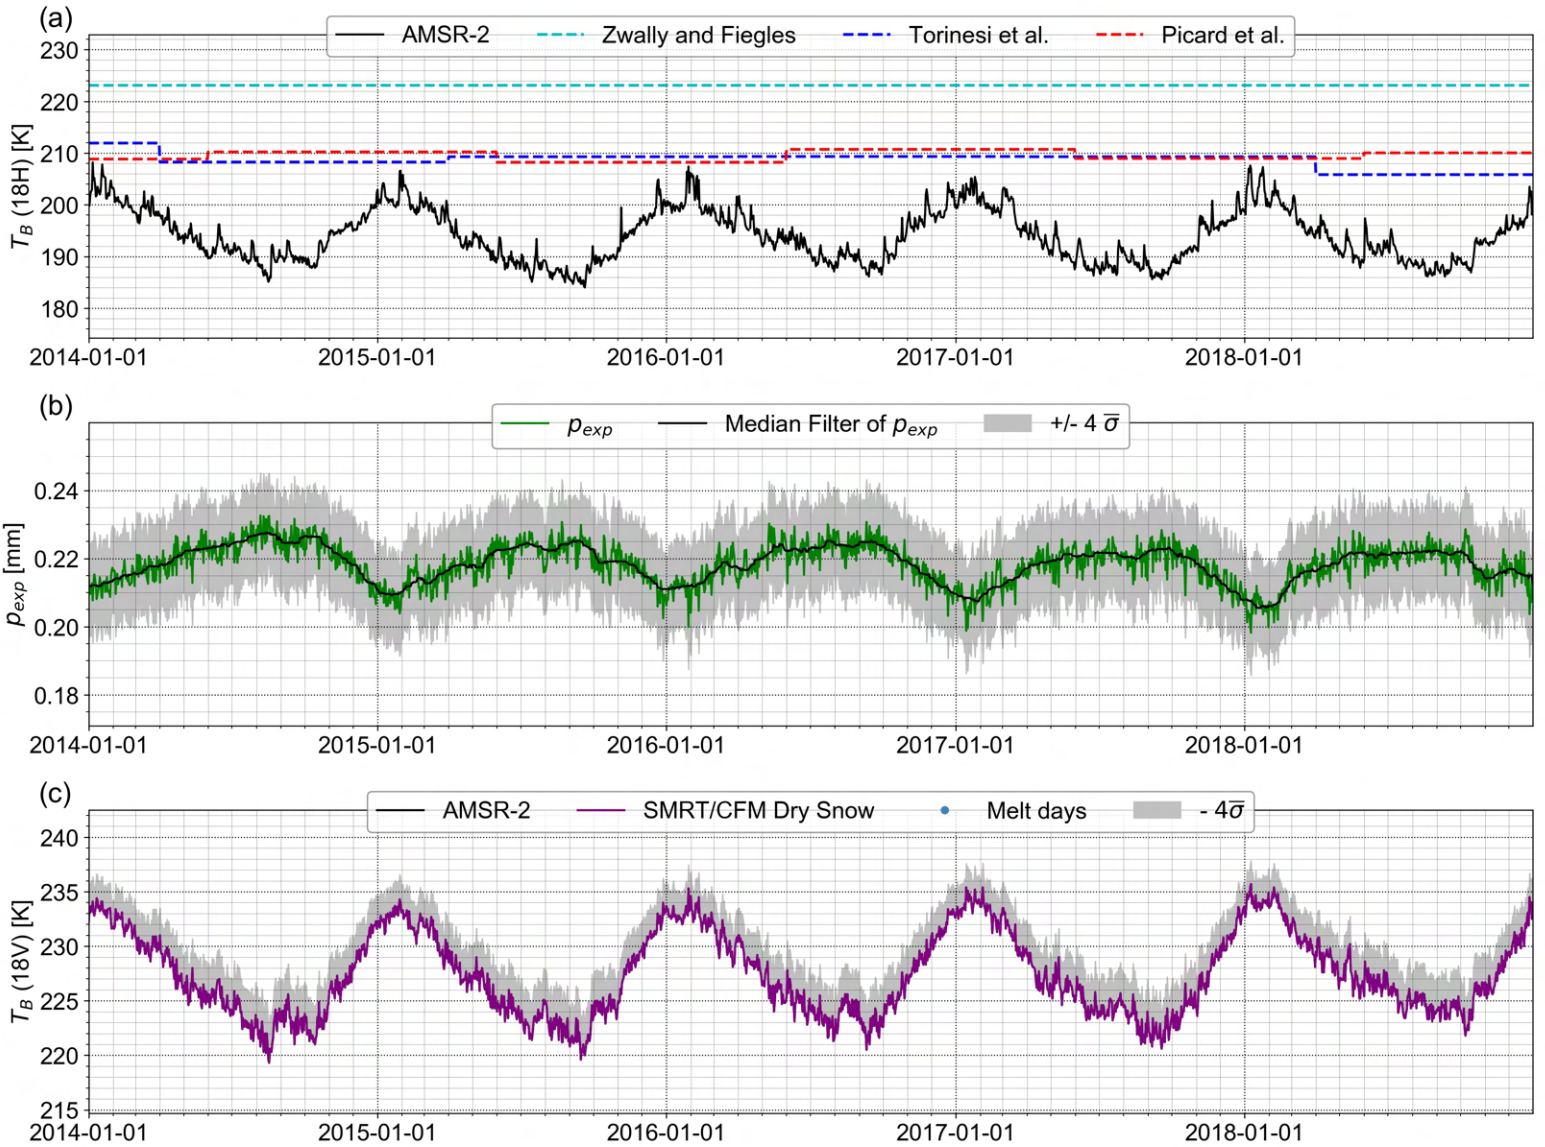



Site: AWS 15, Channel: 18H

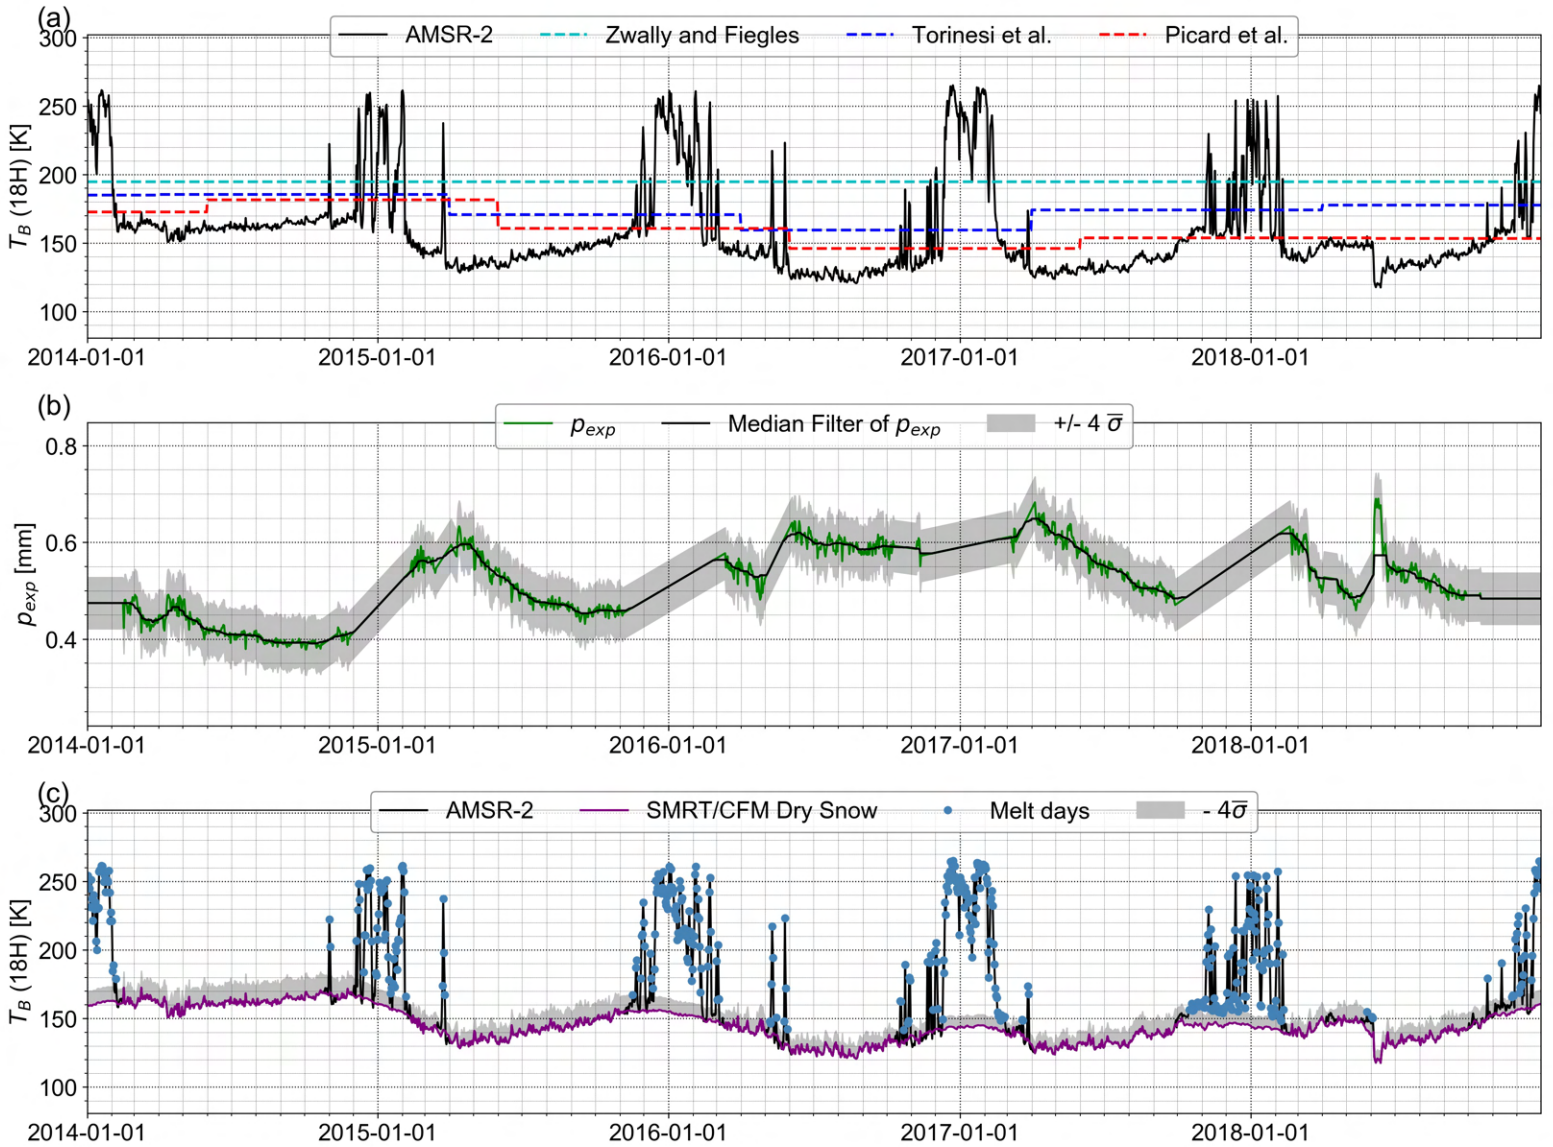

Site: AWS 15, Channel: 18V

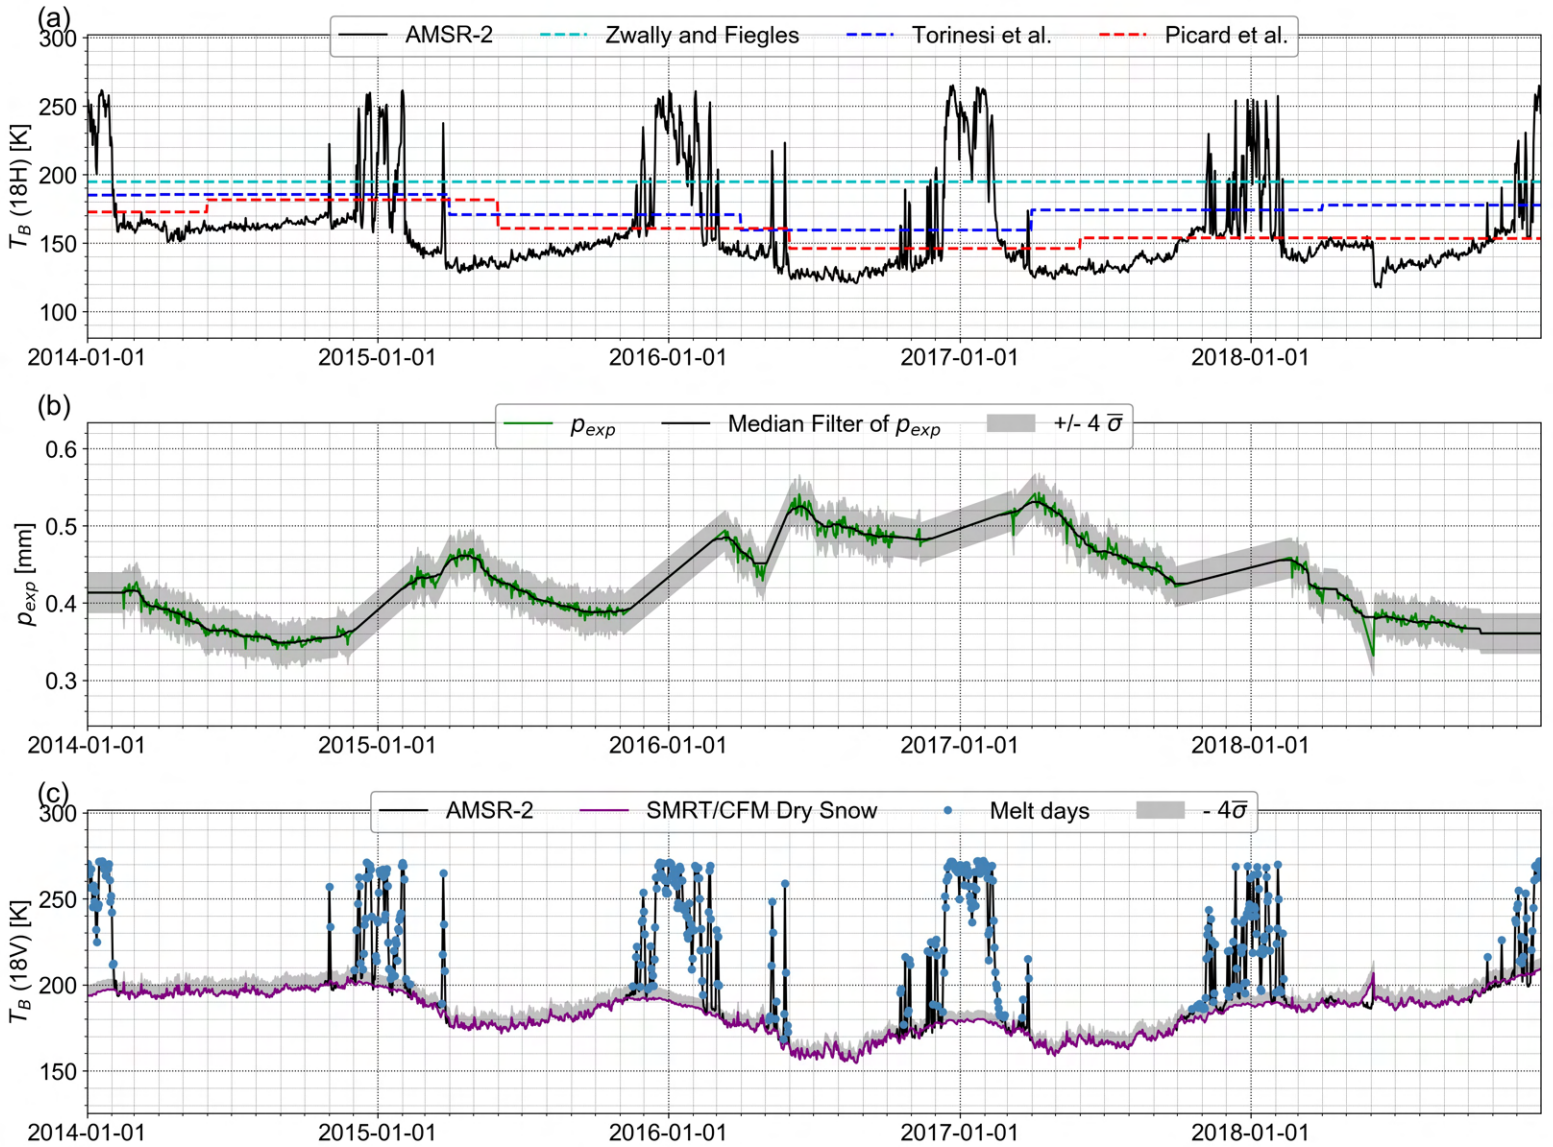

Site: AWS 19, Channel: 18H

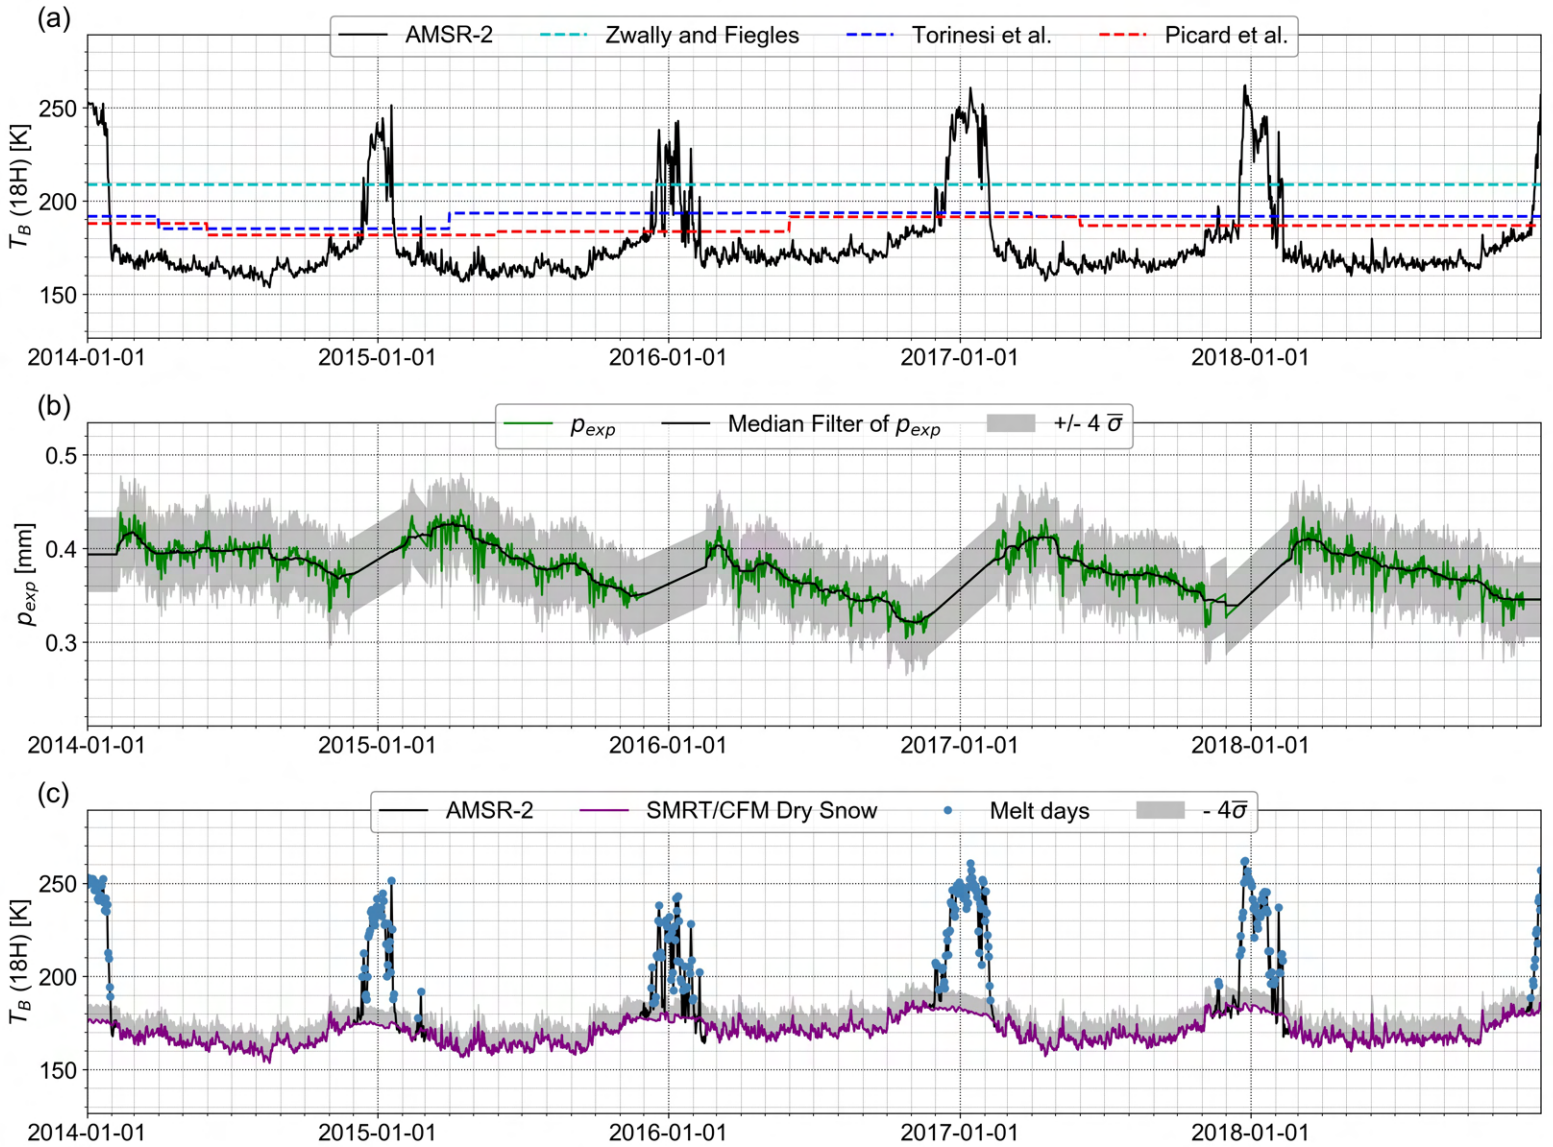

Site: AWS 19, Channel: 18V

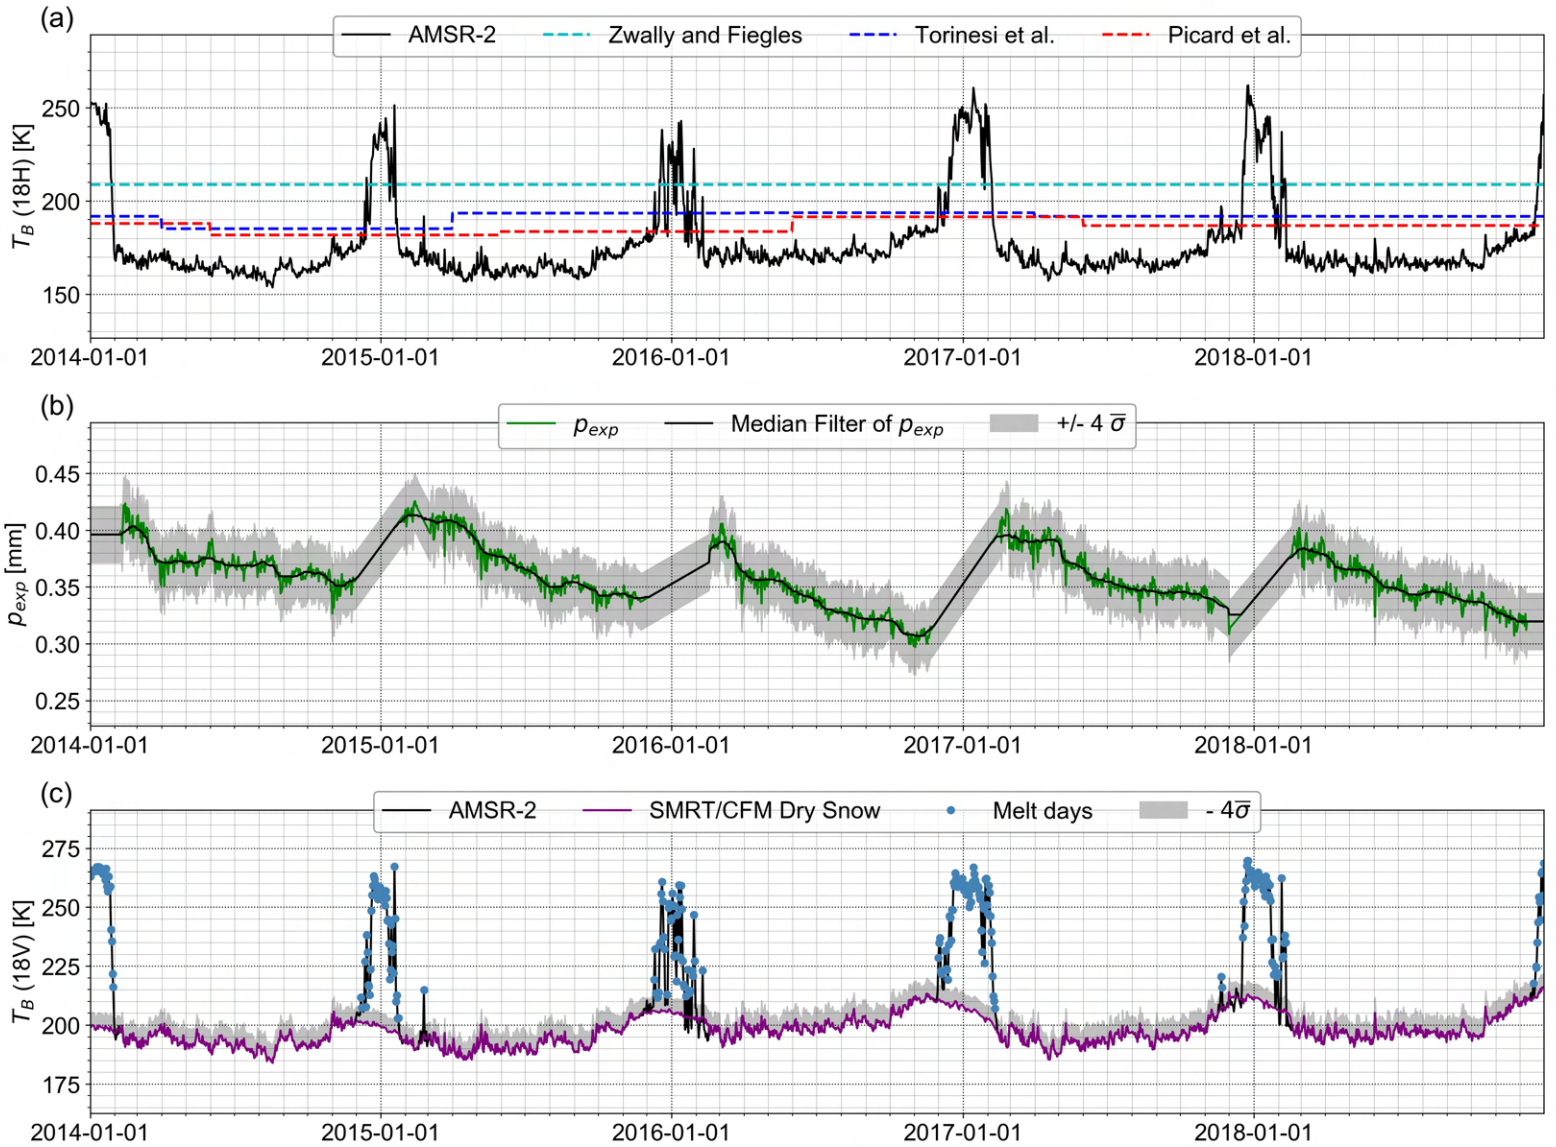

Site: Dome C (Bias Corrected), Channel: 18H

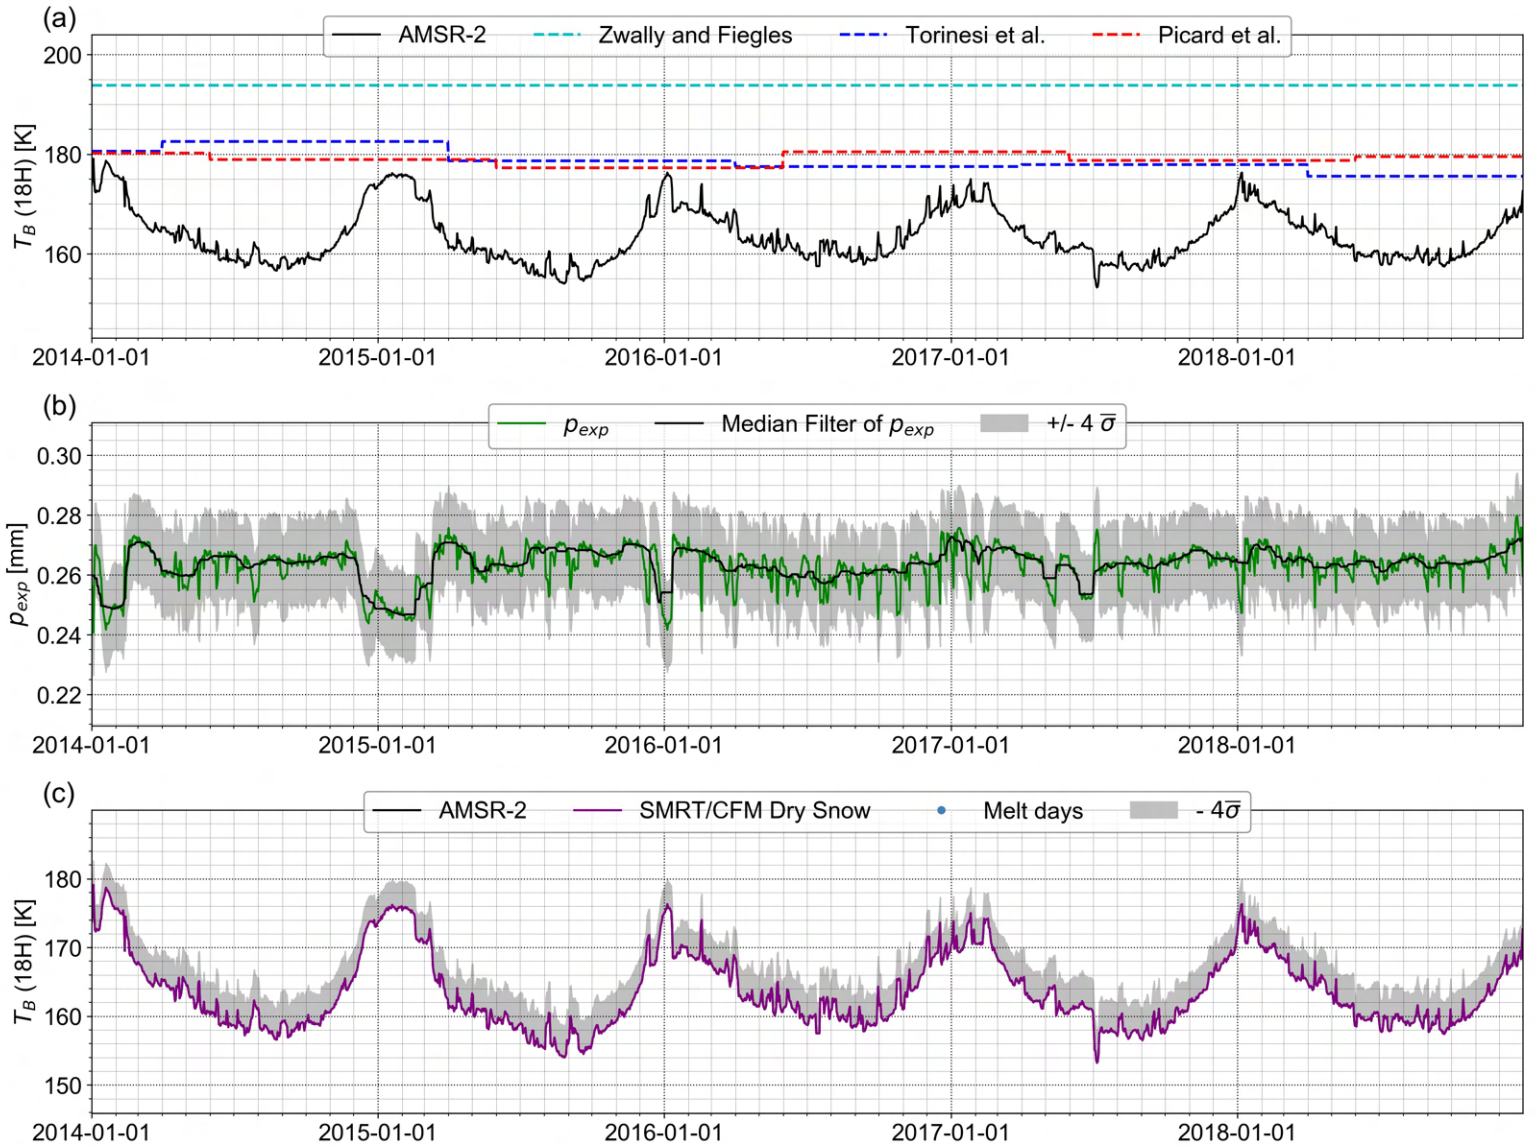

Site: Dome C (Bias Corrected), Channel: 18V

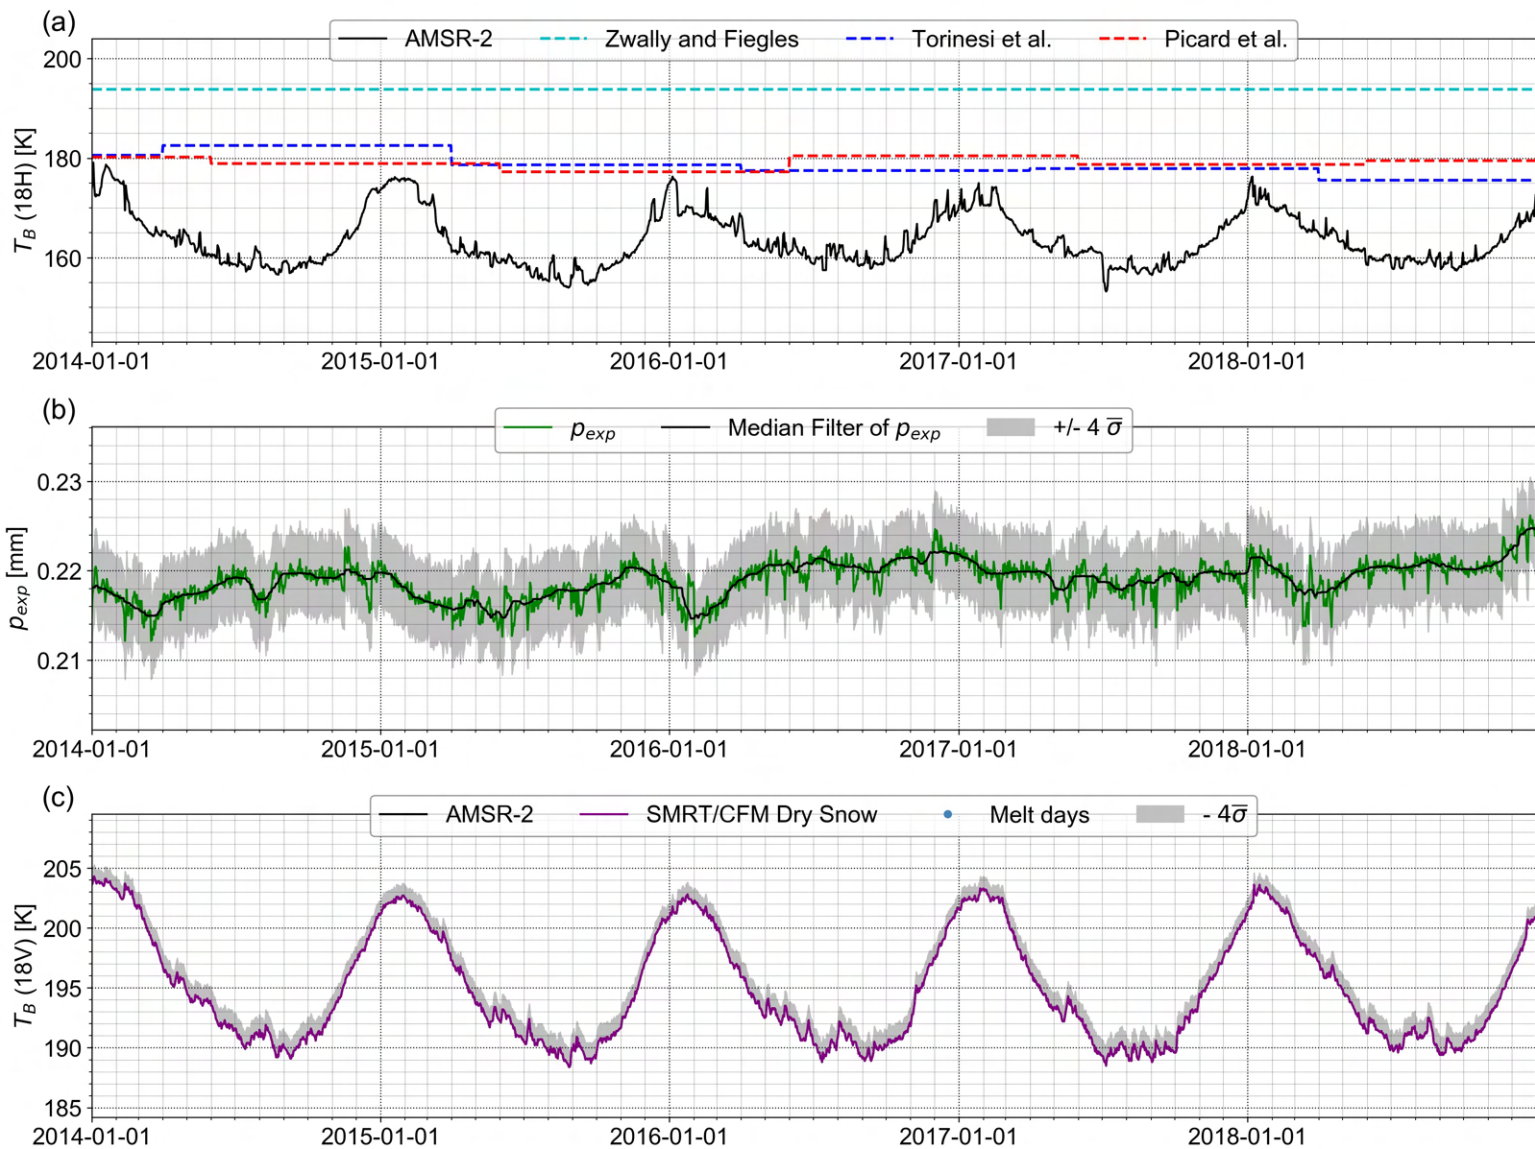

Site: AWS16 (Bias Corrected), Channel: 18H

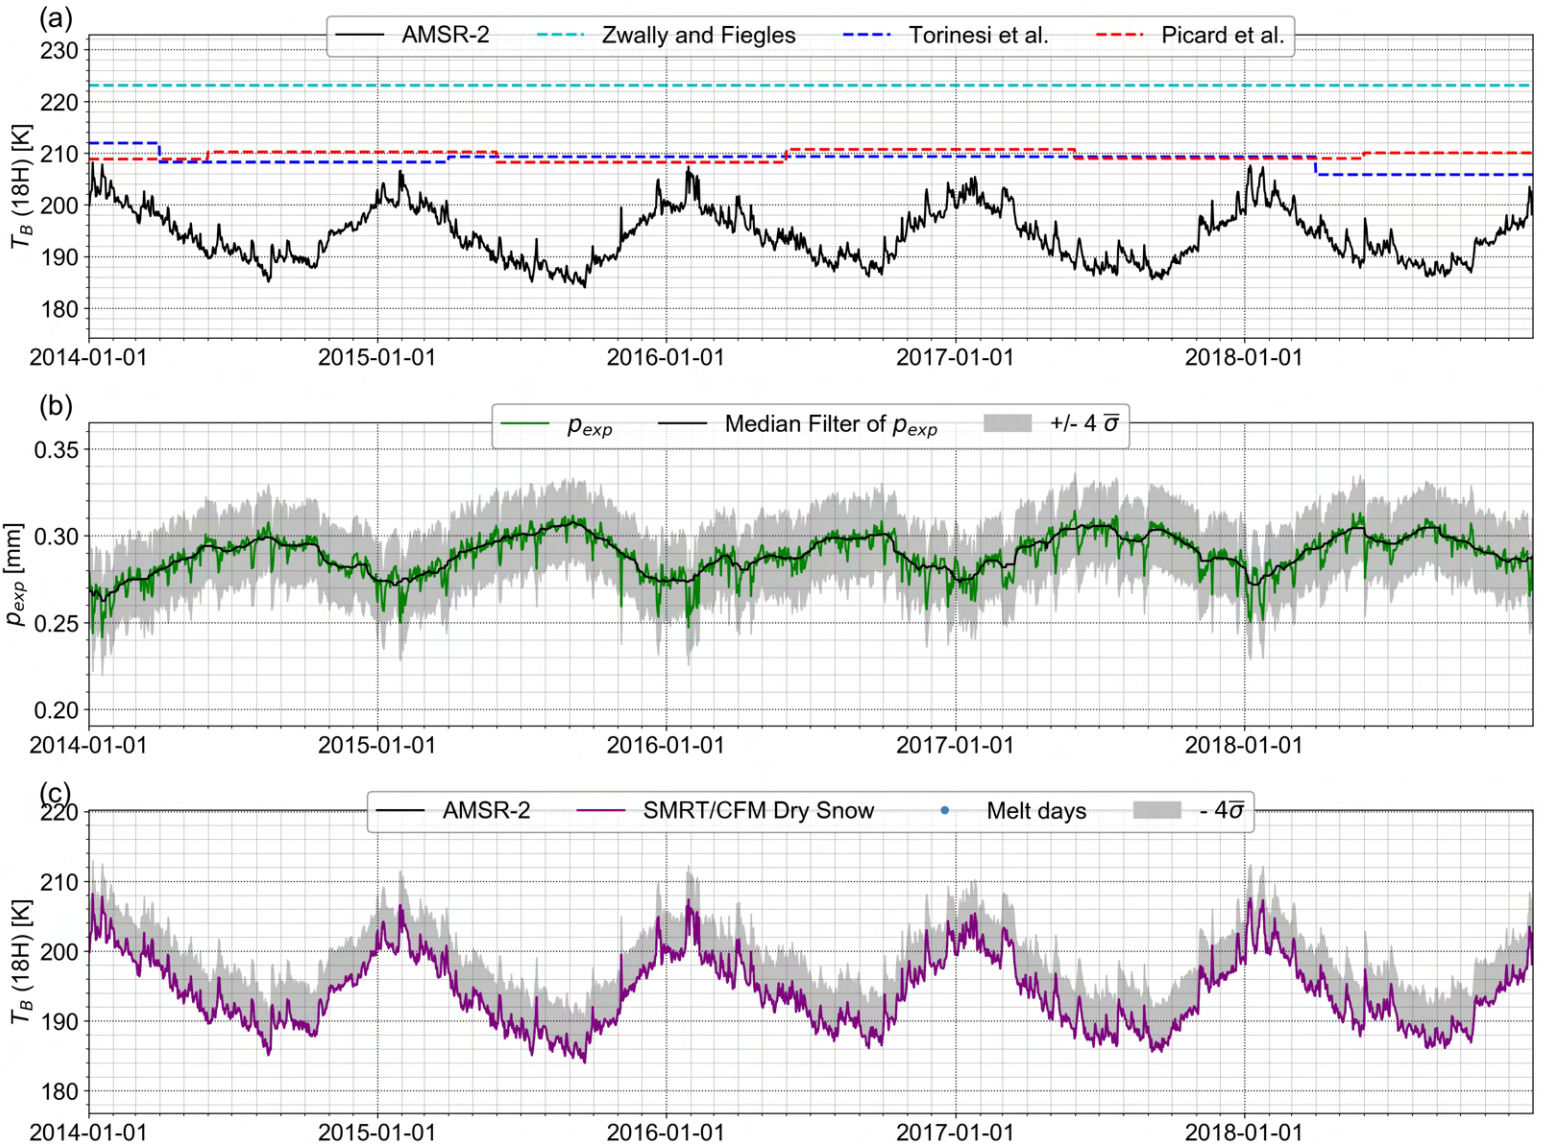

Site: AWS16 (Bias Corrected), Channel: 18V

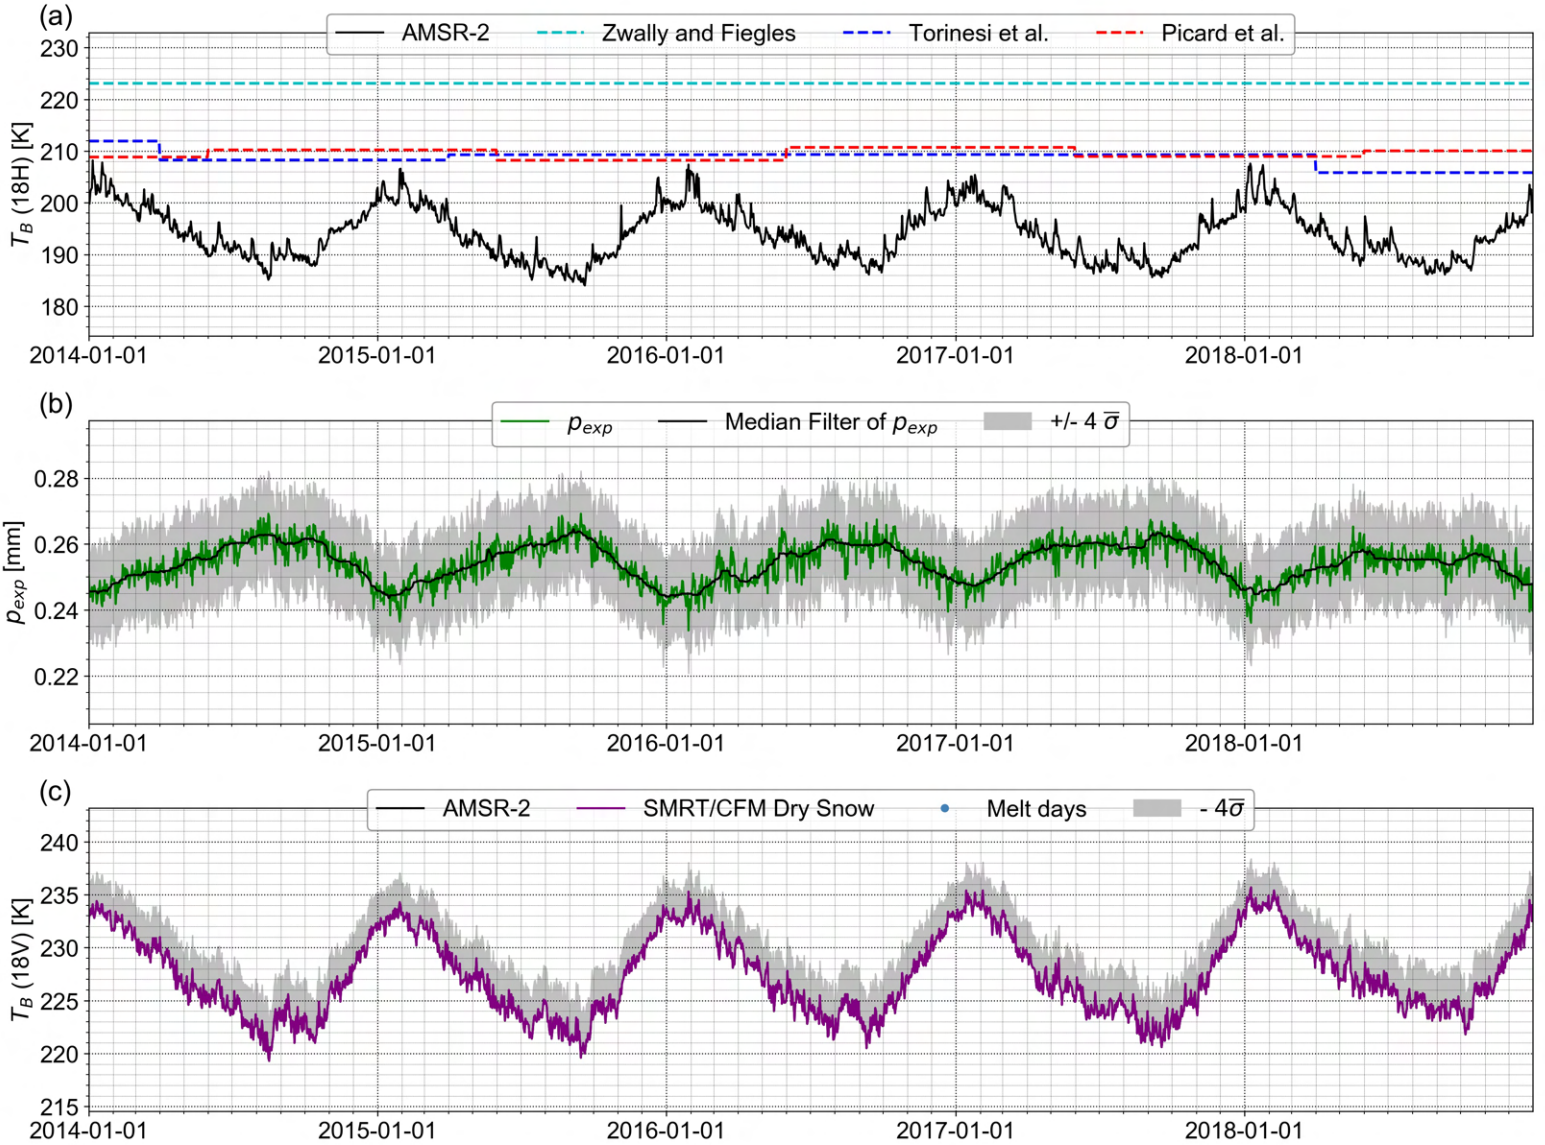

Supplement: Supplementary file 1 [file tc-2023-136-supplement.pdf]
